# Supplementary material for: Extended pancreatic neck transection versus conventional pancreatic neck transection during laparoscopic pancreaticoduodenectomy (LPDEXCEPT): protocol for a multicentre superiority randomised controlled trial
Source: PubMed Central journal article supplement — BMJ Open. 2024 Jan 10;14(1):e078092. doi: 10.1136/bmjopen-2023-078092 (PMC10806631; doi:10.1136/bmjopen-2023-078092), 2024-01-10
Supplement: bmjopen-2023-078092.draft_revisions.pdf [file bmjopen-2023-078092.draft_revisions.pdf]

# BMJ Open

BMJ Open is committed to open peer review. As part of this commitment we make the peer review history of every article we publish publicly available.

When an article is published we post the peer reviewers' comments and the authors' responses online. We also post the versions of the paper that were used during peer review. These are the versions that the peer review comments apply to.

The versions of the paper that follow are the versions that were submitted during the peer review process. They are not the versions of record or the final published versions. They should not be cited or distributed as the published version of this manuscript.

BMJ Open is an open access journal and the full, final, typeset and author-corrected version of record of the manuscript is available on our site with no access controls, subscription charges or pay-per-view fees (<http://bmjopen.bmj.com>).

If you have any questions on BMJ Open's open peer review process please email [info.bmjopen@bmj.com](mailto:info.bmjopen@bmj.com)

# BMJ Open

## Extended pancreatic neck transection versus conventional pancreatic neck transection during laparoscopic pancreaticoduodenectomy (LPDEXCEPT): protocol for a multicenter superiority randomised controlled trial

|                               |                                                                                                                                                                                                                                                                                                                                                                                                                                                                                                                                                                                                                                                                                                                                                                                                                                                                                                                                                                                                                                                                                                                                                                                                                                                                                                                                                                                                |
|-------------------------------|------------------------------------------------------------------------------------------------------------------------------------------------------------------------------------------------------------------------------------------------------------------------------------------------------------------------------------------------------------------------------------------------------------------------------------------------------------------------------------------------------------------------------------------------------------------------------------------------------------------------------------------------------------------------------------------------------------------------------------------------------------------------------------------------------------------------------------------------------------------------------------------------------------------------------------------------------------------------------------------------------------------------------------------------------------------------------------------------------------------------------------------------------------------------------------------------------------------------------------------------------------------------------------------------------------------------------------------------------------------------------------------------|
| Journal:                      | <i>BMJ Open</i>                                                                                                                                                                                                                                                                                                                                                                                                                                                                                                                                                                                                                                                                                                                                                                                                                                                                                                                                                                                                                                                                                                                                                                                                                                                                                                                                                                                |
| Manuscript ID                 | bmjopen-2023-078092                                                                                                                                                                                                                                                                                                                                                                                                                                                                                                                                                                                                                                                                                                                                                                                                                                                                                                                                                                                                                                                                                                                                                                                                                                                                                                                                                                            |
| Article Type:                 | Protocol                                                                                                                                                                                                                                                                                                                                                                                                                                                                                                                                                                                                                                                                                                                                                                                                                                                                                                                                                                                                                                                                                                                                                                                                                                                                                                                                                                                       |
| Date Submitted by the Author: | 24-Jul-2023                                                                                                                                                                                                                                                                                                                                                                                                                                                                                                                                                                                                                                                                                                                                                                                                                                                                                                                                                                                                                                                                                                                                                                                                                                                                                                                                                                                    |
| Complete List of Authors:     | <p>You, Jiaying; Sichuan University West China Hospital, Division of Pancreatic Surgery, Department of General Surgery; Sichuan University West China Hospital, WestChina-California Research Center for Predictive Intervention</p> <p>Zhang, Jing; Sichuan University West China Hospital, Division of Pancreatic Surgery, Department of General Surgery</p> <p>Cai, He; Sichuan University West China Hospital, Division of Pancreatic Surgery, Department of General Surgery</p> <p>Wang, Xin; Sichuan University West China Hospital, Division of Pancreatic Surgery, Department of General Surgery</p> <p>Wang, Hongjian; Sichuan University West China Fourth Hospital, West China School of Public Health</p> <p>Li, Yongbin; Sichuan University West China Hospital, Department of Minimal Invasive Surgery, Shangjin Nanfu Hospital</p> <p>Yu, Chao; The Affiliated Hospital of Guizhou Medical University, Department of Hepatobiliary Surgery</p> <p>Wang, Lei; Qilu Hospital of Shandong University, Department of Pancreatic Surgery</p> <p>Zhou, Xu; Shandong Provincial Hospital, Department of Hepatobiliary Surgery</p> <p>Peng, Bing; Sichuan University West China Hospital, Division of Pancreatic Surgery, Department of General Surgery</p> <p>Cai, Yunqiang; Sichuan University West China Hospital, Division of Pancreatic Surgery, Department of General Surgery</p> |
| Keywords:                     | Pancreatic surgery < SURGERY, Pancreatic disease < GASTROENTEROLOGY, Randomized Controlled Trial                                                                                                                                                                                                                                                                                                                                                                                                                                                                                                                                                                                                                                                                                                                                                                                                                                                                                                                                                                                                                                                                                                                                                                                                                                                                                               |
|                               |                                                                                                                                                                                                                                                                                                                                                                                                                                                                                                                                                                                                                                                                                                                                                                                                                                                                                                                                                                                                                                                                                                                                                                                                                                                                                                                                                                                                |

SCHOLARONE™  
Manuscripts

1  
2  
3  
4 • **Title:**  
5

6 Extended pancreatic neck transection versus conventional pancreatic neck transection  
7 during laparoscopic pancreaticoduodenectomy (LPDEXCEPT): protocol for a  
8 multicenter superiority randomised controlled trial.  
9

10  
11  
12 • **Author names and affiliations**  
13

14 Jiaying You<sup>1,2&</sup>, Jing Zhang<sup>1&</sup>, He Cai<sup>1</sup>, Xin Wang<sup>1</sup>, Hongjian Wang<sup>3</sup>, Yongbin  
15 Li<sup>4</sup>, Chao Yu<sup>5</sup>, Lei Wang<sup>6</sup>, Xu Zhou<sup>7</sup>, Bing Peng<sup>1#</sup>, Yunqiang Cai<sup>1#</sup>  
16  
17

18  
19  
20 <sup>1</sup>Division of Pancreatic Surgery, Department of General Surgery, Sichuan  
21 University West China Hospital  
22

23  
24 <sup>2</sup> WestChina-California Research Center for Predictive Intervention, Sichuan  
25 University West China Hospital  
26

27  
28 <sup>3</sup> West China School of Public Health, Sichuan University West China Fourth  
29 Hospital,  
30

31  
32 <sup>4</sup> Department of Minimal Invasive Surgery, Shangjin Nanfu Hospital, Sichuan  
33 University West China Hospital  
34

35  
36 <sup>5</sup> Department of Hepatobiliary Surgery, the Affiliated Hospital of Guizhou Medical  
37 University  
38

39  
40 <sup>6</sup> Department of Pancreatic Surgery, Qilu Hospital of Shandong University  
41

42  
43 <sup>7</sup> Department of Hepatobiliary Surgery, Shandong Provincial Hospital  
44

45 & Jiaying You and Jing Zhang contributed equally to this protocol.  
46

47 # Bing Peng and Yunqiang Cai are joint corresponding authors.  
48

49 • **Structured abstract:**  
50

51 **Introduction:** Postoperative pancreatic fistula (POPF) remains one of the most  
52 severe complications of laparoscopic pancreaticoduodenectomy (LPD).  
53 Theoretically, the level of pancreatic transection can significantly affect the  
54 occurrence of POPF by influencing both the blood supply and the location of the  
55 main pancreatic duct in the pancreatic transverse section. However, there exists no  
56  
57  
58  
59  
60

1  
2  
3  
4 randomised trial dedicated to answering whether patients could benefit from  
5 extended pancreatic neck transection. The level of pancreatic neck transection  
6 during LPD is not conclusive in clinical practice. Thus, we conduct this  
7 randomised trial with the hypothesis that extended pancreatic neck transection has  
8 superiority to conventional pancreatic neck transection.  
9  
10  
11  
12

13 **Methods and analysis:** The LPDEXCEPT trial is a multicenter, randomized-  
14 controlled, open-label, superiority trial in 4 centers whose annual surgical volume  
15 for LPD is more than 25 cases with pancreatic surgeons who had completed their  
16 learning curve. A total of 154 patients who meet the inclusive and exclusive criteria  
17 are randomly allocated to the extended pancreatic neck transection group or  
18 conventional pancreatic neck transection group in a 1:1 ratio. The stratified  
19 randomised block design will be applied, with stratified factors are surgical center  
20 and the diameter of the main pancreatic duct measured by preoperative CT scan  
21 (preMPD). The primary outcome is the incidence of the clinically relevant  
22 pancreatic fistula.  
23  
24  
25  
26  
27  
28  
29  
30  
31  
32

33 **Ethics and dissemination:** Ethics Committee on Biomedical Research of West  
34 China Hospital of Sichuan University has approved this trial in March  
35 2023(Approval No.2023-167). Results of this trial will be published in peer-  
36 reviewed journals and conference proceedings.  
37  
38  
39  
40

41 **Registration details:** ClinicalTrials.gov: NCT05808894  
42

43 • **Strengths and limitations of this study**  
44

- 45 1. The study is designed as a multicentric, randomised-controlled trial to obtain  
46 conclusion on the highest evidence level to provide the evidence concerning the  
47 possible benefits of extended pancreatic neck transection during laparoscopic  
48 pancreaticoduodenectomy, which had been registered internationally.  
49
- 50 2. This is the first randomised trial to validate the benefits of extended pancreatic neck  
51 transection.  
52
- 53 3. This study applied stratified randomised block design, whose stratified factors are  
54 surgical center and the diameter of the main pancreatic duct measured by the  
55  
56  
57  
58  
59  
60

preoperative abdominal CT scan. This will balance possible bias among research centers and pancreatic features.

4. The main limitation is that this study is carried out by a large team of researchers, including surgeons, radiologists, pathologists, data collectors, and statisticians. The coordination of this team is a big challenge.
5. LPDEXCEPT is an open-label trial, however, the primary and secondary outcomes are objective conditions which can be influenced by researchers.

### • **Introduction**

Pancreaticoduodenectomy is the standard procedure for patients with malignant or benign tumors of the pancreatic head, the lower common bile duct, and the periampullary area of the duodenum. Since Gagner and his colleagues performed and introduced the first total laparoscopic pancreaticoduodenectomy (LPD) in 1994[1], LPD has become progressively acknowledged for its advantages such as less bleeding, less pain, and faster recovery [2-4].

Despite the advances in laparoscopic technology, postoperative pancreatic fistula (POPF) remains one of the most severe complications of LPD, which occurs in around 20% of patients [4,5]. POPF is typically associated with secondary complications, such as post-pancreatectomy hemorrhage, intra-abdominal infection. These could lead to prolonged length of hospital stay, increased hospital cost, and even death [6,7]. Therefore, prevention of POPF has always been of high priority in pancreatic surgery. Theoretically, the level of pancreatic transection can significantly affect the occurrence of POPF by influencing both the blood supply to the anastomosis and the location of the main pancreatic duct in the pancreatic transverse section. The head of the pancreas is supplied by the anterior and posterior pancreaticoduodenal arterial arcades which are formed by branches from the celiac trunk and the superior mesenteric artery. The body and tail of the pancreas are supplied by branches from the splenic artery [8]. And there is an intermediate zone lacking proper vascularization in the neck of the pancreas, called “vascular watershed” [8]. Therefore, the level of pancreatic neck transection

1  
2  
3  
4 might influence the pancreatic stump vascularization. Strasberg et al. have studied the  
5 impact of the defects of pancreatic stump vascularization on POPF and showed there is  
6 a statistically significant correlation [9,10]. The main pancreatic duct arises in the tail  
7 of the pancreas, and lies midway between the superior and inferior margins and slightly  
8 more posterior than anterior through the tail and body of the pancreas. Then it turns  
9 caudad and posterior on reaching the head of the pancreas [8]. Therefore, the level of  
10 pancreatic neck transection could influence the location of the main pancreatic duct in  
11 the pancreatic transverse section. Several studies had revealed the association between  
12 the location of the pancreatic duct and POPF [11,12]. And they found the risk of POPF  
13 was reduced when the center of pancreatic duct is far from the edge of pancreas.  
14

15  
16  
17  
18  
19  
20  
21  
22  
23 Bardol et al. conducted a retrospective cohort study and consolidated that long remnant  
24 pancreatic neck could be an independent risk factor for POPF after  
25 pancreaticoduodenectomy [13]. However, to date, there exists no randomised trial  
26 dedicated to answering whether patients could benefit from extended pancreatic neck  
27 transection. The level of pancreatic neck transection during LPD is not conclusive in  
28 clinical practice. Thus, we conduct this multicenter randomised trial, LPDEXCEPT,  
29 with the hypothesis that extended pancreatic neck transection has superiority to  
30 conventional pancreatic neck transection.  
31  
32  
33  
34  
35  
36  
37  
38  
39  
40

#### 41 • **Methods and analysis**

42  
43 We wrote this protocol in line with the Standard Protocol Item Recommendation for  
44 Interventional Trials (SPIRIT) 2013 guideline [14].  
45

#### 46 **Design**

47  
48 The LPDEXCEPT trial was designed as a multicenter, randomised, controlled, open-  
49 label, superiority trial with two parallel groups. The broad goal of this trial is to evaluate  
50 the superiority of extended pancreatic neck transection during LPD. The primary  
51 objective of this trial is to compare the incidence of clinically relevant pancreatic fistula  
52 (CR-POPF) between the study group and the control group. And the secondary  
53 objective is to compare the incidence of postoperative morbidity (Clavien-Dindo score  
54  
55  
56  
57  
58  
59  
60

1  
2  
3  
4  $\geq 3$ ), the location of pancreatic duct, and the surgical performance of  
5 pancreatojejunostomy between the two groups. The flow diagram for LPDEXCEPT  
6 was shown as figure 1.  
7  
8

### 9 **Study population**

10 All patients with an indication for elective LPD will be evaluated. The inclusion and  
11 exclusion criteria for patients are as follows:  
12  
13

#### 14 *Participants inclusion criteria*

- 15 (1) Patients with benign or resectable malignant tumors of the lower common bile  
16 duct, Vater ampulla, head or uncinata process of the pancreas.
- 17 (2) 18 years old < age < 80 years old, no gender limit.
- 18 (3) Patient is expected survival beyond 3 months.
- 19 (4) No pregnancy or pregnancy plan within 3 months after surgery.
- 20 (5) Nutrition risk score <3 according to the Nutritional Risk Screening for  
21 Inpatients 2002 (NRS2002) standard score [15].
- 22 (6) No contraindication to surgery for anesthetic evaluation.
- 23 (7) The subjects voluntarily joined the study and signed an informed consent form,  
24 with good compliance and cooperation with follow-up.

#### 25 *Participants exclusion criteria*

- 26 (1) Patients with borderline resectable and unresectable malignancies according to  
27 the National Comprehensive Cancer Network (NCCN) and the General Office  
28 of National Health Commission clinical practice guidelines [16,17].
- 29 (2) Patients undergoing neoadjuvant chemotherapy or radiotherapy.
- 30 (3) Patients with tumors exceeding the level of the gastroduodenal artery as  
31 measured by preoperative radiography.
- 32 (4) Intraoperative exploration reveals tumor adhesions with portal vein-superior  
33 mesenteric vein, requiring revascularization and reconstruction.
- 34 (5) Operation transfers to open.
- 35 (6) Operation transfers to other procedure.
- 36 (7) The duct-to-mucosa pancreaticojejunostomy is not performed due to the main  
37  
38  
39  
40  
41  
42  
43  
44  
45  
46  
47  
48  
49  
50  
51  
52  
53  
54  
55  
56  
57  
58  
59  
60

pancreatic duct cannot be found intraoperatively.

### **Interventions**

#### *Study group: Extended transection group*

The patients in extended transection group obtain extended pancreatic neck transection during LPD. Surgeons will transect the pancreatic neck at more than 5 mm and less than 10 mm beyond the left side of the portal vein.

#### *Control group: Conventional transection group*

The patients in conventional transection group obtain conventional pancreatic neck transection during LPD. Surgeons will transect the pancreatic neck above the mesenteric-portal axis.

Figure 2 illustrates the level of the pancreatic neck transection of the two groups.

### **Outcomes**

#### *Primary outcome measures*

The primary outcome is the incidence of the CR-POPF according to the International Study Group of Pancreatic Surgery's (ISGPS) definition and grading [18].

#### *Secondary Outcome Measures*

The secondary outcomes include the location of the pancreatic duct in the pancreatic transverse section, the duration of pancreaticojejunostomy, postoperative morbidity, and mortality within 3 months postoperatively. The location of the pancreatic duct in the pancreatic transverse section will be measured by the way described as following: Before performing the pancreaticojejunostomy, place the pancreatic transverse section in the central position of the lens. Measure the anterior-posterior diameter of the pancreas and the distance of the pancreatic duct from the back of the pancreas. The location of the pancreatic duct in the pancreatic transverse section is equal to the ratio of the distance of the pancreatic duct from the back of the pancreas to the anterior-posterior diameter of the pancreas. Postoperative morbidity will be classified according to the Clavien-Dindo score [19].

### **Participating surgeons and hospital criteria**

The trials will be conducted in tertiary care hospitals and academic hospitals.



1  
2  
3  
4 Participating hospitals must satisfy that annual surgical volume for LPD is more than  
5 25 cases, according to the consensus on LPD [20]. Participating surgeons must have  
6 completed their learning curve for LPD.  
7  
8

### 9 **Sample size**

10  
11 The sample size was determined based on the primary objective of comparing the  
12 incidence of CR-POPF between the two groups. According to the retrospective  
13 study[ 13], extended pancreatic neck transection ( $\geq 7$ mm) was associated with a lower  
14 incidence of CR-POPF than conventional pancreatic neck transection (15.4% vs.  
15 33.3%). Considering this study is a superiority trial, using the one-sided test with 80%  
16 power ( $1-\beta$ ) at a significance level of 5% ( $\alpha$ ), the minimal sample size needed to detect  
17 a significant difference is calculated to be 70 patients in each group. Considering the  
18 loss of follow-up and washout, we enlarged the sample size by 10%. Then, there are 77  
19 patients in each group, and the final sample size is 154 patients.  
20  
21  
22  
23  
24  
25  
26  
27  
28  
29

### 30 **Participant timeline.**

31  
32 The trial time schedule of enrolment is estimated to be a 3-year period, followed by a  
33 3-month follow-up visit after discharge from the hospital. Once the eligibility of the  
34 patients is confirmed, randomization will be applied. The intervention will be applied  
35 intraoperatively. The assessment and visits for patients will be mandatory in the first  
36 month, and third month with either telephone or in-hospital follow-up. The participant  
37 timeline was shown in the Table 1.  
38  
39  
40  
41  
42  
43

### 44 **Recruitment**

45  
46 The recruiters in each center will screen eligible patients through the outpatient  
47 department or inpatient department. The duration of the recruitment period is estimated  
48 to be a 36-month interval depending on each center's recruiting rate. No financial  
49 incentives will be provided to trial investigators or patients for enrolment in the  
50 recruitment period.  
51  
52  
53  
54  
55

### 56 **Randomization and allocation.**

57  
58 Stratified randomised block design with a block number of four will be applied. The  
59  
60

1  
2  
3 stratified factors are surgical center and the diameter of the main pancreatic duct  
4 measured by the preoperative abdominal CT scan (preMPD). According to  
5  
6 classification made by the ISGPS [21], the patients will be stratified into preMPD  $\leq 3$   
7  
8 mm and preMPD  $> 3$  mm.  
9  
10

11  
12 A data manager generated the randomization lists by computer system. The  
13 randomization lists will not be available to surgeons, recruiters, and data collectors.  
14  
15 And the randomization lists will be embedded in a password-protected mobile  
16 application which was created to collect and manage data by our study team. The  
17 randomization will be centralised through the mobile application. Allocation of each  
18 patient will be announced to the surgeon by the mobile application only after the  
19 assessment of baseline information of the patients and the upload of the signed informed  
20 consent.  
21  
22

### 23 24 25 26 27 28 **Blinding**

29  
30 The patients, surgeons, data collectors, outcome assessors and data analysts are  
31 unblinded. The primary outcome of this study is the incidence of CR-POPF. The  
32 definition and the criteria of CR-POPF are objective condition and would not be  
33 influenced by the patients and surgeons even if they are unblinded. And the data  
34 collectors, outcomes assessors and the data analysts are not involved in perioperative  
35 management of the patients. Thus, they have no determination of the CR-POPF.  
36  
37  
38  
39

### 40 41 42 **Data collection and management**

43  
44 Baseline characteristics will be recorded before randomization. Intraoperative  
45 information, histopathological information, primary outcome, and secondary outcomes  
46 will be collected after randomization from hospitalization up to 3 months  
47 postoperatively. The detailed data list was shown in the Table 1.  
48  
49

50  
51 We have created a special mobile application to collect and manage study data. The  
52 mobile application and database are password-protect. The investigators and data  
53 collectors are to be qualified to the access the mobile application and the database. Data  
54 collection will be completed in accordance with standard specification processes. The  
55  
56  
57  
58  
59  
60

investigators and data collectors enter the original data into the mobile application.

#### **Data monitoring**

Data Monitoring Committee (DMC) has been established. It is not competing interests. Through the combination of our internet-based and instantaneous mobile application, the DMC will conduct data monitoring to ensure that the reported clinical study data are accurate, complete, and verifiable from source documents throughout the whole trial.

An interim analysis is performed on the primary endpoint when 50% of patients have been randomised and have completed the 3 months follow-up. The interim analysis is performed by an independent statistician. The statistician will report to the Ethics Committee on Biomedical Research of West China Hospital of Sichuan University. The ethics committee decides on the continuation of the trial.

#### **Harms**

An adverse event will be defined as any untoward medical occurrence in a subject without regard to the possibility of a causal relationship. All adverse events will be collected and recorded in detail according to the Common Terminology Criteria for Adverse Events (CTCAE V.4.0) after the subject has provided consent and enrolled in the study. And the data will be collected by the Ethics Committee on Biomedical Research of West China Hospital of Sichuan University and the ClinicalTrials.gov Protocol Registration and Results System.

#### **Protocol amendments.**

Any modifications to the protocol which may impact on the conduct of the study, potential benefit of the patient or may affect patient safety, including changes of study objectives, study design, patient population, sample sizes, study procedures, or significant administrative aspects will require a formal amendment to the protocol. Such amendment will be agreed upon by the Ethics Committee on Biomedical Research of West China Hospital of Sichuan University. And the health authorities will be notified in accordance with local regulations.

#### **Auditing.**

1  
2  
3  
4 Auditing will be performed per year, at 50% of the inclusions, and at the end of the  
5 study by the Ethics Committee on Biomedical Research of West China Hospital of  
6 Sichuan University. The auditing will be independent from investigators.  
7  
8

9  
10 **Confidentiality.**

11 All study-related information will be stored securely at the study site. All participant  
12 information will be stored in locked file cabinets in areas with limited access. All  
13 databases will be secured with the password-protected data collection system.  
14  
15

16  
17 **Access to data.**

18 All participating investigators will be able to access the data of the registry, perform  
19 statistical analysis, discuss the results, and write the scientific manuscripts. Project  
20 principal investigators will have direct access to their own site's data sets, and will have  
21 access to other sites data by request. Data dispersed to project team members will be  
22 blinded of any identifying participant information.  
23  
24  
25  
26  
27  
28

29 **Statistical methods**

30 Statistical analysis will be performed using IBM SPSS statistics Version 25.0 (SPSS  
31 Inc., Chicago, IL) and the R programme Version 4.2.1 (R Foundation for Statistical  
32 Computing Platform). For continuous variables following a normal distribution, results  
33 were reported as the mean  $\pm$  standard deviation (SD) for the data, otherwise, the  
34 median with interquartile range (IQR) was reported. Categorical variables were  
35 reported as frequency and percentage. The two-side P value  $< 0.05$  was considered  
36 statistically significant. The Chi-Squared test or Fisher's exact test will be used to  
37 compare the categorical data between the study group and the control group as  
38 appropriate. The independent sample T test will be used to compare the continuous  
39 variables following a normal distribution between the two groups. And the continuous  
40 non-normally distributed variables will be compared using the Mann-Whitney U test.  
41 A Logistic regression analysis will be performed to investigate predictors of CR-POPF.  
42  
43  
44  
45  
46  
47  
48  
49  
50  
51  
52  
53  
54  
55  
56  
57  
58  
59  
60 All variables with a p value  $< 0.1$  in a univariable analysis are included in the  
multivariable Logistic regression analysis.

1  
2  
3  
4 Bias due to missing data will be investigated by comparing the baseline characteristics  
5 of participants with and without missing values. Analysis in all randomly assigned  
6 patients (intention-to-treat analysis) will be conducted as sensitivity analyses. In  
7 addition, multiple imputations will be used to impute missing data, and the imputed  
8 data will also be analyzed as part of the sensitivity analyses. The primary and secondary  
9 outcomes will also be analyzed in all eligible patients who began the protocol treatment  
10 (per-protocol population), excluding ineligible patients and those not receiving the  
11 allocated treatment from all randomly assigned patients.  
12  
13  
14  
15  
16  
17  
18  
19  
20

### 21 • **Ethics and dissemination**

22  
23 The ethics approval of the trial has been obtained from the Ethics Committee on  
24 Biomedical Research of West China Hospital of Sichuan University in March 2023  
25 (Approval No.2023-167). The ethics Committee of each participating centers had  
26 accepted the decision of ethical review of the Ethics Committee on Biomedical  
27 Research of West China Hospital of Sichuan University. The English and Chinese  
28 versions of the informed consent materials were shown in Appendix 1. Trained research  
29 surgeons will introduce the trial to patients who have the indication for LPD. Patients  
30 will then be able to have an informed discussion with the participating consultant.  
31 Research surgeons will obtain written consent from patients willing to participate in the  
32 trial before entering the study.  
33  
34  
35  
36  
37  
38  
39  
40  
41  
42

43 The result of this study will be reported according to the CONSORT2010 guidelines  
44 [22]. Any study results will be published in peer-reviewed journals and conference  
45 proceedings. The results will be released to the participating physicians, referring  
46 physicians, patients, and the general medical community.  
47  
48  
49  
50  
51  
52

### 53 • **References**

54  
55 1. Gagner M, Pomp A. Laparoscopic pylorus-preserving pancreatoduodenectomy.  
56 Surg Endosc. 1994;8(5):408-410.  
57  
58  
59  
60

- 1  
2  
3  
4 2. de Rooij T, Lu MZ, Steen M, et al. Minimally Invasive Versus Open  
5  
6 Pancreatoduodenectomy: Systematic Review and Meta-analysis of Comparative  
7  
8 Cohort and Registry Studies. *Ann Surg.* 2016;264(2):257-267.
- 9  
10 3. Zhang H, Wu X, Zhu F, et al. Systematic review and meta-analysis of minimally  
11  
12 invasive versus open approach for pancreaticoduodenectomy. *Surg Endosc.*  
13  
14 2016;30(12):5173-5184.
- 15  
16 4. Nickel F, Haney CM, Kowalewski KF, et al. Laparoscopic Versus Open  
17  
18 Pancreaticoduodenectomy: A Systematic Review and Meta-analysis of Randomized  
19  
20 Controlled Trials. *Ann Surg.* 2020;271(1):54-66.
- 21  
22 5. Klompmaker S, van Hilst J, Wellner UF, et al. Outcomes After Minimally-invasive  
23  
24 Versus Open Pancreatoduodenectomy: A Pan-European Propensity Score Matched  
25  
26 Study. *Ann Surg.* 2020;271(2):356-363.
- 27  
28 6. Smits FJ, Verweij ME, Daamen LA, et al. Impact of Complications After  
29  
30 Pancreatoduodenectomy on Mortality, Organ Failure, Hospital Stay, and  
31  
32 Readmission: Analysis of a Nationwide Audit. *Ann Surg.* 2022;275(1): e222-e228.
- 33  
34 7. Abbott DE, Tzeng CW, McMillan MT, et al. Pancreas fistula risk prediction:  
35  
36 implications for hospital costs and payments. *HPB (Oxford).* 2017;19(2):140-146.
- 37  
38 8. Skandalakis LJ, Rowe JS, Jr., et al. Surgical embryology and anatomy of the  
39  
40 pancreas. *Surg Clin North Am.* 1993;73(4):661-697.
- 41  
42 9. Strasberg SM, McNevin MS. Results of a technique of pancreaticojejunostomy that  
43  
44 optimizes blood supply to the pancreas. *J Am Coll Surg.* 1998;187(6):591-596.
- 45  
46 10. Strasberg SM, Drebin JA, Mokadam NA, et al. Prospective trial of a blood  
47  
48 supply-based technique of pancreaticojejunostomy: effect on anastomotic failure in  
49  
50 the Whipple procedure. *J Am Coll Surg.* 2002;194(6):746-760.
- 51  
52 11. El Nakeeb A, Salah T, Sultan A, et al. Pancreatic anastomotic leakage after  
53  
54 pancreaticoduodenectomy. Risk factors, clinical predictors, and management (single  
55  
56 center experience). *World J Surg.* 2013;37(6):1405-1418.
- 57  
58 12. Yamamoto Y, Sakamoto Y, Nara S, et al. A preoperative predictive scoring  
59  
60 system for postoperative pancreatic fistula after pancreaticoduodenectomy. *World J*

- 1  
2  
3  
4 Surg. 2011;35(12):2747-2755.
- 5  
6 13. Bardol T, Delicque J, Hermida M, et al. Neck transection level and postoperative  
7 pancreatic fistula after pancreaticoduodenectomy: A retrospective cohort study of 195  
8 patients. *Int J Surg.* 2020; 82:43-50.
- 9  
10  
11 14. Chan AW, Tetzlaff JM, Altman DG, et al. SPIRIT 2013 statement: defining  
12 standard protocol items for clinical trials. *Ann Intern Med.* 2013;158(3):200-207.
- 13  
14  
15 15. Budzyński J, Tojek K, Czerniak B, et al. Scores of nutritional risk and parameters  
16 of nutritional status assessment as predictors of in-hospital mortality and readmissions  
17 in the general hospital population. *Clin Nutr.* 2016;35(6):1464-1471.
- 18  
19  
20  
21 16. Chiorean EG, Chiaro MD, Tempero MA, et al. Ampullary Adenocarcinoma,  
22 Version 1.2023, NCCN Clinical Practice Guidelines in Oncology. *J Natl Compr Canc*  
23 *Netw.* 2023;21(7):753-782.
- 24  
25  
26  
27 17. General Office of National Health Commission. Standard for diagnosis and  
28 treatment of pancreatic cancer (2022 edition). *J Clin Hepatol*,2022, 38(5):1006-1015.
- 29  
30  
31 18. Bassi C, Marchegiani G, Dervenis C, et al. The 2016 update of the International  
32 Study Group (ISGPS) definition and grading of postoperative pancreatic fistula: 11  
33 Years After. *Surgery.* 2017;161(3):584-591.
- 34  
35  
36  
37 19. Dindo D, Demartines N, Clavien PA. Classification of surgical complications: a  
38 new proposal with evaluation in a cohort of 6336 patients and results of a survey. *Ann*  
39 *Surg.* 2004;240(2):205-213.
- 40  
41  
42  
43 20. Qin R, Kendrick ML, Wolfgang CL, et al. International expert consensus on  
44 laparoscopic pancreaticoduodenectomy. *Hepatobiliary Surg Nutr.* 2020;9(4):464-483.
- 45  
46  
47 21. Schuh F, Mihaljevic AL, Probst P, et al. A Simple Classification of Pancreatic  
48 Duct Size and Texture Predicts Postoperative Pancreatic Fistula: A classification of  
49 the International Study Group of Pancreatic Surgery. *Ann Surg.* 2023;277(3): e597-  
50 e608.
- 51  
52  
53  
54 22. Moher D, Hopewell S, Schulz KF, et al. CONSORT 2010 explanation and  
55 elaboration: updated guidelines for reporting parallel group randomised trials. *Bmj.*  
56 2010;340:c869.
- 57  
58  
59  
60

- **Figure legend**

Figure 1. Flow diagram for LPDEXCEPT.

Figure 2. The level of the pancreatic neck transection of the two groups. The green dotted line illustrates the level of the pancreatic neck transection. (a). illustrates the level of the pancreatic neck transection of Conventional transection group, in which surgeons will transect the pancreatic neck above the mesenteric-portal axis. (b). illustrates the level of the pancreatic neck transection of Extended transection group, in which surgeons will transect the pancreatic neck at more than 5 mm and less than 10 mm beyond the left side of the mesenteric-portal axis.

- **Authors' contributions**

Bing Peng obtained funding for this study. Yunqiang Cai proposed the conceptualization. Jiaying You, Jing Zhang, Xin Wang and He Cai designed the study. Hongjian Wang calculated the sample size. Bing Peng, Yunqiang Cai, Yongbin Li, Chao Yu, Lei Wang, and Xu Zhou performed the operations. Jiaying You and Jing Zhang drafted the manuscript. Yunqiang Cai and Bing Peng contributed to critical revision of the manuscript and approved the final version of the manuscript. All authors have read and approved the final manuscript.

- **Funding statement**

This study was supported by 1.3.5 project for disciplines of excellence, West China Hospital, Sichuan University (2018HXFH015).

- **Competing Interests statement**

None declared.

- **Acknowledgements**



1  
2  
3  
4  
5  
6  
7  
8  
9  
10  
11  
12  
13  
14  
15  
16  
17  
18  
19  
20  
21  
22  
23  
24  
25  
26  
27  
28  
29  
30  
31  
32  
33  
34  
35  
36  
37  
38  
39  
40  
41  
42  
43  
44  
45  
46  
47  
48  
49  
50  
51  
52  
53  
54  
55  
56  
57  
58  
59  
60

We thank Dr. Xinrui Zhu for the support of this study registration.

For peer review only

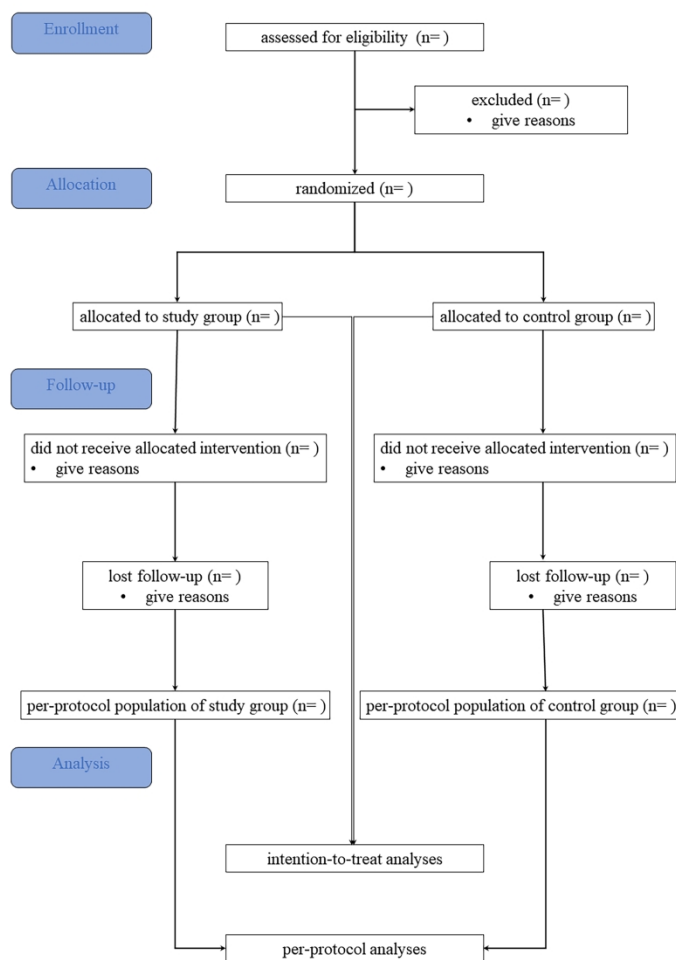

Figure 1. Flow diagram for LPDEXCEPT.

645x1148mm (118 x 118 DPI)

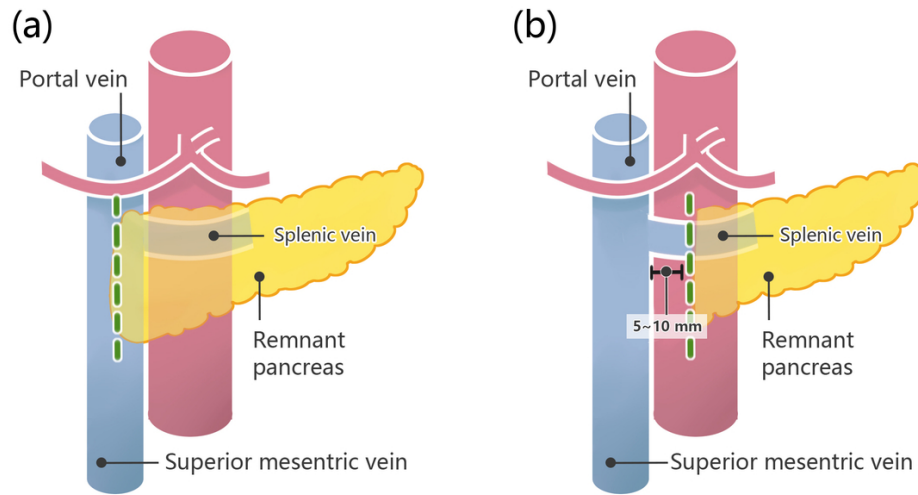

figure 2. The level of the pancreatic neck transection of the two groups. The green dotted line illustrates the level of the pancreatic neck transection. (a). illustrates the level of the pancreatic neck transection of Conventional transection group, in which surgeons will transect the pancreatic neck above the mesenteric-portal axis. (b). illustrates the level of the pancreatic neck transection of Extended transection group, in which surgeons will transect the pancreatic neck at more than 5 mm and less than 10 mm beyond the left side of the mesenteric-portal axis.

98x56mm (300 x 300 DPI)

Table 1: Participant timeline and data collection for LPDEXCEPT

| Time point<br><br>Items      | Study period                              |            |                  |                                     |                                       |                                       |
|------------------------------|-------------------------------------------|------------|------------------|-------------------------------------|---------------------------------------|---------------------------------------|
|                              | preoperative<br>eligibility<br>assessment | allocation | intraoperatively | Before discharge<br>postoperatively | Follow-up                             | Close-out                             |
|                              |                                           |            |                  |                                     | 1 <sup>st</sup> month postoperatively | 3 <sup>rd</sup> month postoperatively |
| Patient demographics         | ✓                                         |            |                  |                                     |                                       |                                       |
| Informed consent             | ✓                                         |            |                  |                                     |                                       |                                       |
| Blood routine                | ✓                                         |            |                  | ✓                                   |                                       |                                       |
| Coagulation routine          | ✓                                         |            |                  |                                     |                                       |                                       |
| Blood biochemistry           | ✓                                         |            |                  | ✓                                   |                                       |                                       |
| Enhanced CT scan             | ✓                                         |            |                  | ✓                                   |                                       |                                       |
| Allocation record            |                                           | ✓          |                  |                                     |                                       |                                       |
| Surgical videos              |                                           |            | ✓                |                                     |                                       |                                       |
| Surgical record              |                                           |            | ✓                |                                     |                                       |                                       |
| Postoperative records        |                                           |            |                  | ✓                                   | ✓                                     | ✓                                     |
| Histopathological findings   |                                           |            |                  | ✓                                   | ✓                                     |                                       |
| Other therapy (if necessary) |                                           |            |                  | ✓                                   | ✓                                     | ✓                                     |

Patient demographics includes date of admission, year of birth, sex, body mass index, previous surgical history, preoperative biliary drainage, Nutrition risk score, WHO-ECOG score, location of the tumor, diameter of the tumor, diameter of the main pancreatic duct, and history of neoadjuvant therapy.

Surgical record includes date of operation, ASA scores, location of the pancreatic neck transection (extended or conventional pancreatic neck transection), pancreatic texture, diameter of the main pancreatic duct, duration of pancreaticojejunostomy anastomosis, duration of the operation, estimated blood loss, whether to convert to open surgery or other procedures, whether to preserve the pylorus, and whether to resect and reconstruct the main veins.

Postoperative records include blood transfusion, date of soft solid diet, date of drain removal, date of nasogastric tube removal, drain and production amylase, date of discharge, type of complication, reoperation and Clavien-Dindo grade, cost for hospitalization.

Histopathological findings include location of the tumor, size of the tumor, histological type, surgical margin status, and the T&N classification and American Joint Committee on Cancer staging (AJCC) for malignant tumors.

Other therapy includes readmission, treatment for any surgical complications, adjuvant therapy for malignant tumors, and the cost for readmission.

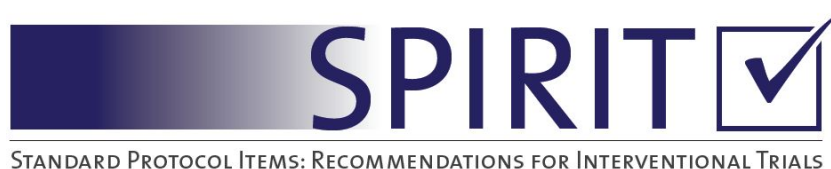

SPIRIT 2013 Checklist: Recommended items to address in a clinical trial protocol and related documents\*

| Section/item                      | Item No | Description                                                                                                                                                                                                                                                                              | Page No. |
|-----------------------------------|---------|------------------------------------------------------------------------------------------------------------------------------------------------------------------------------------------------------------------------------------------------------------------------------------------|----------|
| <b>Administrative information</b> |         |                                                                                                                                                                                                                                                                                          |          |
| Title                             | 1       | Descriptive title identifying the study design, population, interventions, and, if applicable, trial acronym                                                                                                                                                                             | 1        |
| Trial registration                | 2a      | Trial identifier and registry name. If not yet registered, name of intended registry                                                                                                                                                                                                     | 2        |
|                                   | 2b      | All items from the World Health Organization Trial Registration Data Set                                                                                                                                                                                                                 | -        |
| Protocol version                  | 3       | Date and version identifier                                                                                                                                                                                                                                                              | -        |
| Funding                           | 4       | Sources and types of financial, material, and other support                                                                                                                                                                                                                              | 14       |
| Roles and responsibilities        | 5a      | Names, affiliations, and roles of protocol contributors                                                                                                                                                                                                                                  | 14       |
|                                   | 5b      | Name and contact information for the trial sponsor                                                                                                                                                                                                                                       | 14       |
|                                   | 5c      | Role of study sponsor and funders, if any, in study design; collection, management, analysis, and interpretation of data; writing of the report; and the decision to submit the report for publication, including whether they will have ultimate authority over any of these activities | 14       |
|                                   | 5d      | Composition, roles, and responsibilities of the coordinating centre, steering committee, endpoint adjudication committee, data management team, and other individuals or groups overseeing the trial, if applicable (see Item 21a for data monitoring committee)                         | -        |
| <b>Introduction</b>               |         |                                                                                                                                                                                                                                                                                          |          |
| Background and rationale          | 6a      | Description of research question and justification for undertaking the trial, including summary of relevant studies (published and unpublished) examining benefits and harms for each intervention                                                                                       | 3, 4     |
|                                   | 6b      | Explanation for choice of comparators                                                                                                                                                                                                                                                    | -        |
| Objectives                        | 7       | Specific objectives or hypotheses                                                                                                                                                                                                                                                        | 4        |
| Trial design                      | 8       | Description of trial design including type of trial (eg, parallel group, crossover, factorial, single group), allocation ratio, and framework (eg, superiority, equivalence, noninferiority, exploratory)                                                                                | 4        |

## Methods: Participants, interventions, and outcomes

|                      |     |                                                                                                                                                                                                                                                                                                                                                                                |   |
|----------------------|-----|--------------------------------------------------------------------------------------------------------------------------------------------------------------------------------------------------------------------------------------------------------------------------------------------------------------------------------------------------------------------------------|---|
| Study setting        | 9   | Description of study settings (eg, community clinic, academic hospital) and list of countries where data will be collected. Reference to where list of study sites can be obtained                                                                                                                                                                                             | 7 |
| Eligibility criteria | 10  | Inclusion and exclusion criteria for participants. If applicable, eligibility criteria for study centres and individuals who will perform the interventions (eg, surgeons, psychotherapists)                                                                                                                                                                                   | 5 |
| Interventions        | 11a | Interventions for each group with sufficient detail to allow replication, including how and when they will be administered                                                                                                                                                                                                                                                     | 6 |
|                      | 11b | Criteria for discontinuing or modifying allocated interventions for a given trial participant (eg, drug dose change in response to harms, participant request, or improving/worsening disease)                                                                                                                                                                                 | 6 |
|                      | 11c | Strategies to improve adherence to intervention protocols, and any procedures for monitoring adherence (eg, drug tablet return, laboratory tests)                                                                                                                                                                                                                              | 6 |
|                      | 11d | Relevant concomitant care and interventions that are permitted or prohibited during the trial                                                                                                                                                                                                                                                                                  | - |
| Outcomes             | 12  | Primary, secondary, and other outcomes, including the specific measurement variable (eg, systolic blood pressure), analysis metric (eg, change from baseline, final value, time to event), method of aggregation (eg, median, proportion), and time point for each outcome. Explanation of the clinical relevance of chosen efficacy and harm outcomes is strongly recommended | 6 |
| Participant timeline | 13  | Time schedule of enrolment, interventions (including any run-ins and washouts), assessments, and visits for participants. A schematic diagram is highly recommended (see Figure)                                                                                                                                                                                               | 7 |
| Sample size          | 14  | Estimated number of participants needed to achieve study objectives and how it was determined, including clinical and statistical assumptions supporting any sample size calculations                                                                                                                                                                                          | 7 |
| Recruitment          | 15  | Strategies for achieving adequate participant enrolment to reach target sample size                                                                                                                                                                                                                                                                                            | 7 |

## Methods: Assignment of interventions (for controlled trials)

### Allocation:

|                     |     |                                                                                                                                                                                                                                                                                                                                                          |   |
|---------------------|-----|----------------------------------------------------------------------------------------------------------------------------------------------------------------------------------------------------------------------------------------------------------------------------------------------------------------------------------------------------------|---|
| Sequence generation | 16a | Method of generating the allocation sequence (eg, computer-generated random numbers), and list of any factors for stratification. To reduce predictability of a random sequence, details of any planned restriction (eg, blocking) should be provided in a separate document that is unavailable to those who enrol participants or assign interventions | 8 |
|---------------------|-----|----------------------------------------------------------------------------------------------------------------------------------------------------------------------------------------------------------------------------------------------------------------------------------------------------------------------------------------------------------|---|

|    |                                                           |     |                                                                          |        |
|----|-----------------------------------------------------------|-----|--------------------------------------------------------------------------|--------|
| 1  |                                                           |     |                                                                          |        |
| 2  | Allocation                                                | 16b | Mechanism of implementing the allocation sequence (eg, central           | 8      |
| 3  | concealment                                               |     | telephone; sequentially numbered, opaque, sealed envelopes),             |        |
| 4  | mechanism                                                 |     | describing any steps to conceal the sequence until interventions are     |        |
| 5  |                                                           |     | assigned                                                                 |        |
| 6  |                                                           |     |                                                                          |        |
| 7  | Implementation                                            | 16c | Who will generate the allocation sequence, who will enrol participants,  | 8      |
| 8  |                                                           |     | and who will assign participants to interventions                        |        |
| 9  |                                                           |     |                                                                          |        |
| 10 | Blinding                                                  | 17a | Who will be blinded after assignment to interventions (eg, trial         | 8      |
| 11 | (masking)                                                 |     | participants, care providers, outcome assessors, data analysts), and     |        |
| 12 |                                                           |     | how                                                                      |        |
| 13 |                                                           |     |                                                                          |        |
| 14 |                                                           |     |                                                                          |        |
| 15 |                                                           | 17b | If blinded, circumstances under which unblinding is permissible, and     | -      |
| 16 |                                                           |     | procedure for revealing a participant's allocated intervention during    |        |
| 17 |                                                           |     | the trial                                                                |        |
| 18 |                                                           |     |                                                                          |        |
| 19 |                                                           |     |                                                                          |        |
| 20 | <b>Methods: Data collection, management, and analysis</b> |     |                                                                          |        |
| 21 | Data collection                                           | 18a | Plans for assessment and collection of outcome, baseline, and other      | 8, 9   |
| 22 | methods                                                   |     | trial data, including any related processes to promote data quality (eg, |        |
| 23 |                                                           |     | duplicate measurements, training of assessors) and a description of      |        |
| 24 |                                                           |     | study instruments (eg, questionnaires, laboratory tests) along with      |        |
| 25 |                                                           |     | their reliability and validity, if known. Reference to where data        |        |
| 26 |                                                           |     | collection forms can be found, if not in the protocol                    |        |
| 27 |                                                           |     |                                                                          |        |
| 28 |                                                           |     |                                                                          |        |
| 29 |                                                           |     |                                                                          |        |
| 30 |                                                           | 18b | Plans to promote participant retention and complete follow-up,           | 8, 9   |
| 31 |                                                           |     | including list of any outcome data to be collected for participants who  |        |
| 32 |                                                           |     | discontinue or deviate from intervention protocols                       |        |
| 33 |                                                           |     |                                                                          |        |
| 34 | Data                                                      | 19  | Plans for data entry, coding, security, and storage, including any       | 8, 9   |
| 35 | management                                                |     | related processes to promote data quality (eg, double data entry;        |        |
| 36 |                                                           |     | range checks for data values). Reference to where details of data        |        |
| 37 |                                                           |     | management procedures can be found, if not in the protocol               |        |
| 38 |                                                           |     |                                                                          |        |
| 39 |                                                           |     |                                                                          |        |
| 40 | Statistical                                               | 20a | Statistical methods for analysing primary and secondary outcomes.        | 10, 11 |
| 41 | methods                                                   |     | Reference to where other details of the statistical analysis plan can be |        |
| 42 |                                                           |     | found, if not in the protocol                                            |        |
| 43 |                                                           |     |                                                                          |        |
| 44 |                                                           | 20b | Methods for any additional analyses (eg, subgroup and adjusted           | 10, 11 |
| 45 |                                                           |     | analyses)                                                                |        |
| 46 |                                                           |     |                                                                          |        |
| 47 |                                                           | 20c | Definition of analysis population relating to protocol non-adherence     | 10, 11 |
| 48 |                                                           |     | (eg, as randomised analysis), and any statistical methods to handle      |        |
| 49 |                                                           |     | missing data (eg, multiple imputation)                                   |        |
| 50 |                                                           |     |                                                                          |        |
| 51 |                                                           |     |                                                                          |        |
| 52 | <b>Methods: Monitoring</b>                                |     |                                                                          |        |
| 53 |                                                           |     |                                                                          |        |
| 54 | Data monitoring                                           | 21a | Composition of data monitoring committee (DMC); summary of its role      | 9      |
| 55 |                                                           |     | and reporting structure; statement of whether it is independent from     |        |
| 56 |                                                           |     | the sponsor and competing interests; and reference to where further      |        |
| 57 |                                                           |     | details about its charter can be found, if not in the protocol.          |        |
| 58 |                                                           |     | Alternatively, an explanation of why a DMC is not needed                 |        |
| 59 |                                                           |     |                                                                          |        |
| 60 |                                                           |     |                                                                          |        |

|    |          |     |                                                                        |    |
|----|----------|-----|------------------------------------------------------------------------|----|
| 1  |          |     |                                                                        |    |
| 2  |          | 21b | Description of any interim analyses and stopping guidelines, including | 9  |
| 3  |          |     | who will have access to these interim results and make the final       |    |
| 4  |          |     | decision to terminate the trial                                        |    |
| 5  |          |     |                                                                        |    |
| 6  | Harms    | 22  | Plans for collecting, assessing, reporting, and managing solicited and | 9  |
| 7  |          |     | spontaneously reported adverse events and other unintended effects     |    |
| 8  |          |     | of trial interventions or trial conduct                                |    |
| 9  |          |     |                                                                        |    |
| 10 |          |     |                                                                        |    |
| 11 | Auditing | 23  | Frequency and procedures for auditing trial conduct, if any, and       | 10 |
| 12 |          |     | whether the process will be independent from investigators and the     |    |
| 13 |          |     | sponsor                                                                |    |
| 14 |          |     |                                                                        |    |

## Ethics and dissemination

|    |                   |     |                                                                               |    |
|----|-------------------|-----|-------------------------------------------------------------------------------|----|
| 15 |                   |     |                                                                               |    |
| 16 |                   |     |                                                                               |    |
| 17 | Research ethics   | 24  | Plans for seeking research ethics committee/institutional review board        | 11 |
| 18 | approval          |     | (REC/IRB) approval                                                            |    |
| 19 |                   |     |                                                                               |    |
| 20 |                   |     |                                                                               |    |
| 21 | Protocol          | 25  | Plans for communicating important protocol modifications (eg,                 | 9  |
| 22 | amendments        |     | changes to eligibility criteria, outcomes, analyses) to relevant parties      |    |
| 23 |                   |     | (eg, investigators, REC/IRBs, trial participants, trial registries, journals, |    |
| 24 |                   |     | regulators)                                                                   |    |
| 25 |                   |     |                                                                               |    |
| 26 | Consent or assent | 26a | Who will obtain informed consent or assent from potential trial               | 11 |
| 27 |                   |     | participants or authorised surrogates, and how (see Item 32)                  |    |
| 28 |                   |     |                                                                               |    |
| 29 |                   |     |                                                                               |    |
| 30 |                   | 26b | Additional consent provisions for collection and use of participant data      | -  |
| 31 |                   |     | and biological specimens in ancillary studies, if applicable                  |    |
| 32 |                   |     |                                                                               |    |
| 33 | Confidentiality   | 27  | How personal information about potential and enrolled participants will       | 10 |
| 34 |                   |     | be collected, shared, and maintained in order to protect confidentiality      |    |
| 35 |                   |     | before, during, and after the trial                                           |    |
| 36 |                   |     |                                                                               |    |
| 37 | Declaration of    | 28  | Financial and other competing interests for principal investigators for       | 14 |
| 38 | interests         |     | the overall trial and each study site                                         |    |
| 39 |                   |     |                                                                               |    |
| 40 |                   |     |                                                                               |    |
| 41 | Access to data    | 29  | Statement of who will have access to the final trial dataset, and             | 10 |
| 42 |                   |     | disclosure of contractual agreements that limit such access for               |    |
| 43 |                   |     | investigators                                                                 |    |
| 44 |                   |     |                                                                               |    |
| 45 | Ancillary and     | 30  | Provisions, if any, for ancillary and post-trial care, and for                | -  |
| 46 | post-trial care   |     | compensation to those who suffer harm from trial participation                |    |
| 47 |                   |     |                                                                               |    |
| 48 | Dissemination     | 31a | Plans for investigators and sponsor to communicate trial results to           | 11 |
| 49 | policy            |     | participants, healthcare professionals, the public, and other relevant        |    |
| 50 |                   |     | groups (eg, via publication, reporting in results databases, or other         |    |
| 51 |                   |     | data sharing arrangements), including any publication restrictions            |    |
| 52 |                   |     |                                                                               |    |
| 53 |                   |     |                                                                               |    |
| 54 |                   | 31b | Authorship eligibility guidelines and any intended use of professional        | 11 |
| 55 |                   |     | writers                                                                       |    |
| 56 |                   |     |                                                                               |    |
| 57 |                   | 31c | Plans, if any, for granting public access to the full protocol, participant-  | 11 |
| 58 |                   |     | level dataset, and statistical code                                           |    |
| 59 |                   |     |                                                                               |    |
| 60 |                   |     |                                                                               |    |



**Appendices**

|                            |    |                                                                                                                                                                                                |          |
|----------------------------|----|------------------------------------------------------------------------------------------------------------------------------------------------------------------------------------------------|----------|
| Informed consent materials | 32 | Model consent form and other related documentation given to participants and authorised surrogates                                                                                             | Appendix |
| Biological specimens       | 33 | Plans for collection, laboratory evaluation, and storage of biological specimens for genetic or molecular analysis in the current trial and for future use in ancillary studies, if applicable | -        |

---

For peer review only

Informed consent  
Version date: 2023-02-21 version: V2.0

---

Informed Consent for Extended pancreatic neck transection versus conventional pancreatic neck transection during laparoscopic pancreaticoduodenectomy (LPDEXCEPT): a multicenter superiority randomized controlled trial

Informed page

Dear Mrs. /Mr.,

Thank you for your interest in our clinical research! We will invite you to participate in a randomized controlled clinical trial of extended pancreatic neck transection versus conventional pancreatic neck transection during laparoscopic pancreaticoduodenectomy (LPDEXCEPT).

Before you decide whether to participate in this study, please read the following as much as possible to help you understand the research, the purpose, the research process, and deadlines, and what may be brought after you participate in this study, which might be benefits, risks or discomfort. If you prefer, you can also discuss it with your family, friends, or ask your doctor for an explanation.

This clinical trial has been approved by the Ethics Committee on Biomedical Research of West China Hospital of Sichuan University (2023-167) in March 2023. And the number of participants in this study is expected to be 154.

## I. Why to participate in this trial? (Research background and research purposes)

Pancreaticoduodenectomy is the standard procedure for patients with malignant or benign tumors of the pancreatic head, the lower common bile duct, and the periampullary area of the duodenum. Since Gagner and his colleagues performed and introduced the first total laparoscopic pancreaticoduodenectomy (LPD) in 1994, LPD has become progressively acknowledged for its advantages such as less bleeding, less pain, and faster recovery.

Despite the advances in laparoscopic technology, postoperative pancreatic fistula (POPF) remains one of the most severe complications of LPD, which occurs in around 20% of patients. POPF is typically associated with secondary complications, such as post-pancreatectomy hemorrhage, intra-abdominal infection. These could lead to prolonged length of hospital stay, increased hospital cost, and even death. Therefore, prevention of POPF has always been of high priority in pancreatic surgery.

The level of pancreatic neck transection during LPD is not conclusive. Theoretically, the level of pancreatic transection can significantly affect the occurrence of POPF by influencing both the blood supply to the anastomosis and the location of the main pancreatic duct in the pancreatic transverse section. The head of the pancreas is supplied by the anterior and posterior pancreaticoduodenal arterial arcades which are formed by branches from the celiac trunk and the superior mesenteric artery. The body and tail of the pancreas are supplied by branches from the splenic artery. And there is an intermediate zone lacking proper vascularization in the neck of the pancreas, called “vascular watershed”. Therefore, the level of pancreatic neck transection might influence the pancreatic stump vascularization. Strasberg and his colleagues have studied the impact of the defects of pancreatic stump vascularization on POPF and showed there is a statistically significant correlation. The main pancreatic duct arises in the tail of the pancreas, and lies midway between the superior and inferior margins and slightly more posterior than anterior through the tail and body of the pancreas. Then it

Informed consent  
Version date: 2023-02-21 version: V2.0

---

turns caudad and posterior on reaching the head of the pancreas. Therefore, the level of pancreatic neck transection could influence the location of the main pancreatic duct in the pancreatic transverse section. Angzhi Li and his colleagues have studied the impact of the location of the pancreatic duct on POPF. And they found the risk of POPF was reduced when the center of pancreatic duct is far from the edge of pancreas.

Bardol and his colleagues conducted a retrospective cohort study and consolidated that a long remnant pancreatic neck could be an independent risk factor for POPF after pancreaticoduodenectomy. However, to date, there exists no randomized study dedicated to answering whether patients could benefit from extended pancreatic neck transection during LPD. Thus, we conduct a multicenter randomized trial, LPDEXCEPT, with the hypothesis that extended pancreatic neck transection has superiority to conventional pancreatic neck transection.

The broad goal of this trial is to evaluate the superiority of extended pancreatic neck transection during LPD.

## II. What will be done if you participate in the research?

If you meet the inclusion criteria and agree to participate, you will be tested according to the following steps: divided into two groups according to the study plan, respectively, undergoing extended pancreatic neck transection or conventional pancreatic neck transection during LPD. You may be assigned in any group. All patients underwent routine nursing of biliary and pancreatic surgery, and collected various indexes before, during and after surgery. At the same time, follow-up for 3 months. The time points of follow-up were the first and third month postoperatively. The follow-up method was ward follow-up combined with telephone follow-up.

## III. What are the alternative treatment options?

Patients with resectable benign or malignant tumors of the lower common bile duct, periampullary region of the duodenum, and head of the pancreas could participate in this trial. Alternative treatment options for patients with benign tumors include regular follow-up with conservative observation. According to the existing guidelines, surgical resection is preferred for patients with resectable malignant tumors, and no other treatment alternatives are recommended.

## IV. Who can participate in this study? Who is not suitable for research?

Who can:

- (1) Patients with benign or resectable malignant tumors of the lower common bile duct, Vater ampulla, head or uncinata process of the pancreas.
- (2) 18 years old < age < 80 years old, no gender limit.

Informed consent

Version date: 2023-02-21 version: V2.0

- (3) Patient is expected survival beyond 3 months.
- (4) No pregnancy or pregnancy plan within 3 months after surgery.
- (5) Nutrition risk score <3 according to the Nutritional Risk Screening for Inpatients 2002 (NRS2002) standard score.
- (6) No contraindication to surgery for anesthetic evaluation.
- (7) The subjects voluntarily joined the study and signed an informed consent form, with good compliance and cooperation with follow-up.

Who not:

- (1) Patients with borderline resectable and unresectable malignancies.
- (2) Patients undergoing neoadjuvant chemotherapy or radiotherapy.
- (3) Patients with tumors exceeding the level of the gastroduodenal artery as measured by preoperative radiography.
- (4) Intraoperative exploration reveals tumor adhesions with portal vein-superior mesenteric vein, requiring revascularization and reconstruction.
- (5) Operation transfers to open.
- (6) Operation transfers to other procedure.

## V. Adverse reactions, risks, and protective measures for participating in the study.

The main adverse reactions and risks are as follows:

1. In the operation, the surgical method is determined according to medical conditions according to the condition.
2. Due to the patient's condition (critical, complicated, poor systemic conditions), individual differences, sudden and sudden recession may occur during and after surgery, multiple organ failure (such as heart failure, respiratory failure, liver failure, renal function) Failure, DIC, etc.) or unpredictable changes in the condition can be life-threatening.
3. Major bleeding, hemorrhagic shock may occur during surgery, and life-threatening.
4. The operation is due to anatomical variation and severe adhesion for therapeutic purposes. It may be inevitable to damage surrounding and nearby tissues and organs, and the corresponding organs need to be repaired or reconstructed.
5. Special medical supplies such as chemotherapy pumps, anastomotic devices, etc. may be used during surgery, and special treatments such as radiofrequency therapy and cryotherapy may be used during surgery.
6. Tumor patients may not be able to undergo surgical resection due to the condition, or recurrence and metastasis after resection, requiring further treatment.
7. Recurrent bleeding after surgery, local, systemic infection, bile leakage, pancreatic leakage, intestinal leakage, anastomotic leakage, and other changes in the condition may be life-threatening and require reoperation if necessary.
8. Other unforeseen or unpredictable adverse consequences and medical risks.
9. May need to be admitted to the ICU ward, if necessary, after surgery.
10. Postoperative examination may be inconsistent with preoperative diagnosis and intraoperative diagnosis. The final diagnosis is based on postoperative examination.

Informed consent  
Version date: 2023-02-21 version: V2.0

---

11. Determine the risk of biopsy of the lesion under the endoscope under the condition of the operation.

12. During the operation, malignant tumor metastasis is found, and it is difficult to cure radically or radically. The risk of radical resection is great. Only palliative anastomosis is possible.

13. During the operation, the abdominal cavity is widely metastasized, and it is impossible to perform resection or palliative anastomosis.

14. Postoperative abdominal adhesions, intestinal adhesions, intestinal obstruction, may require relevant treatment.

15. Long-term bed rest, pulmonary infection, and deep vein thrombosis may occur.

16. Incision healing may occur after surgery, infection of the incision, incision splitting, incisional hernia, etc.

17. Pancreatic exocrine insufficiency.

18. Laparoscopic pancreaticoduodenectomy may be due to tissue adhesion, intraoperative bleeding, etc.

19. Pneum abdominal syndrome, etc.

## VI. What will be done in the event of any of these adverse events during the study?

If there is any discomfort in the study, or the condition changes, or any unexpected situation, regardless of whether it is related to treatment, you should promptly notify your doctor, he/she will make an accurate judgment and medical treatment. deal with. If the patients participating in the trial have the above complications, they will form a professional medical team to deal with and treat them for the first time. If an adverse event occurs in a clinical trial, the Medical Expert Committee will determine if it is related to surgery or trial. The treatment and examinations required for other diseases that you have combined at the same time will not be included in the free range.

## VII. Possible benefits of participating in the Study.

By participating in this study, your condition may improve. And the study may help determine which treatments are safer and more effective in treating other patients with conditions like yours.

## VIII. The relevant costs.

Subjects will not pay for participation in this trial, except for the costs incurred during the treatment.

## IX. The confidentiality of clinical data.

Your medical records (research medical records, CRF, test results, etc.) will be kept completely at

Informed consent  
Version date: 2023-02-21 version: V2.0

---

the hospital where you are attending. The doctor will record the results of the tests and other tests on your medical record. Researchers, ethics committees, and higher-level medical administrations will be allowed to access your medical records. Any public report about the results of this study will not disclose your personal identity. We will make every effort to protect the privacy of your personal medical information to the extent permitted by law. According to medical research ethics, in addition to personal privacy information, experimental data will be available for public inquiry and sharing. Query and sharing will be limited to web-based electronic databases, ensuring that no personal privacy information will be disclosed.

## X. Do you have to participate in the trial?

Whether or not to participate in the research is entirely up to you. You may decline to participate in the study or withdraw from the study at any time during the study, which will not affect your relationship with the doctor and will not affect your medical or other benefits.

For your best interest, your doctor or researcher may discontinue your participation in this study at any time during your research.

Informed consent  
Version date: 2023-02-21 version: V2.0

---

Signature page

**Clinical Research Project:** Extended pancreatic neck transection versus conventional pancreatic neck transection during laparoscopic pancreaticoduodenectomy (LPDEXCEPT): a multicenter superiority randomized controlled trial.

**Research Center Name:** \_\_\_\_\_

Subject's Statement: I have carefully read the contents of the informed consent form, and the researchers have answered my questions. I fully participated in the study and fully cooperated with the researcher after fully understanding the purpose, method, possible therapeutic benefits and possible risks and other provisions mentioned in the informed consent form. I understand that I can withdraw from the study at any time, and I do not need any reason. The medical services I receive and the legal rights I enjoy are not affected at all. Finally, I decided to agree to participate in this study and to ensure compliance with my doctor's advice.

**Subject Signature:** \_\_\_\_\_

**Date:** \_\_\_\_\_

**Contact Number:** \_\_\_\_\_

**Subject's Legal Agent signature (If applicable):**

**Date:** \_\_\_\_\_

**Contact Number:** \_\_\_\_\_

**Doctor's Statement:** I have explained fully detail to the subjects, including the potential risks.

**Doctor Signature:** \_\_\_\_\_

**Date:** \_\_\_\_\_

**Contact Number:** \_\_\_\_\_

**Ethics Committee on Biomedical Research of West China Hospital of Sichuan University**  
**Contact Number:028-85422654, 028-85423237**

# 探究腹腔镜胰十二指肠切除术中胰颈离断位置与术后胰瘘发生的相关性关系

## 临床研究知情同意书

### 尊敬的受试者

我们邀请您参加四川大学华西医院批准开展的“探究腹腔镜胰十二指肠切除术中胰颈离断位置与术后胰瘘发生的相关性关系”课题研究。本研究将在贵州医科大学附属医院、攀枝花中心医院、山东省立医院、复旦大学附属肿瘤医院、广东省中医院、乐山市人民医院、云南省第一人民医院、常州市第一人民医院、齐鲁医院、南方医院等医院共同开展，估计将有 184 名受试者自愿参加。本研究已经得到四川大学华西医院生物医学伦理审查委员会的审查和批准。

#### 1. 为什么要开展本项研究？

胰十二指肠切除术是治疗胰腺头部、胆总管下段及十二指肠壶腹周围肿瘤的标准术式。随着微创外科理念的不断发展，腹腔镜胰十二指肠切除术由于具有创伤小、出血量少、恢复快、疼痛轻等优势而得以发展。

胰瘘是 LPD 术后常见的并发症。探究 POPF 发生相关性因素，从而精准预防和管理 POPF、降低 POPF 发生率是胰腺外科领域主要研究内容。

目前导管对黏膜是学界广泛接受的胰肠吻合方式，手术操作时须将胰颈切缘面的主胰管和小肠黏膜进行缝合，既往相关研究表明主胰管在胰颈切缘面的位置是影响手术时吻合操作的因素之一，主胰管是否在切缘中央与术后是否发生 POPF 相关。主胰管在胰腺不同部位的走行位置不同：在胰腺体尾部，主胰管走行于胰腺的中间；从胰腺体部向胰腺头部的过程中，主胰管走行方向逐渐偏向足侧和后侧。因此，LPD 手术过程中，离断胰腺颈部的的位置决定了主胰管在胰腺切缘断面的位置。

胰腺各部分动脉血供不同：胰腺头部的血供主要由胃十二指肠动脉发出的胰十二指肠上动脉和肠系膜上动脉发出的胰十二指肠下动脉形成的胰十二指肠前后动脉弓完成；胰腺体尾部的血供主要由脾动脉发出的数支分支完成。胰腺颈部血供由胰背动脉完成，而该动脉常存在变异和缺失，因此胰腺颈部常存在一段乏血供区。因此，在 LPD 术中，离断胰腺颈部的的位置也影响胰腺切缘面血供是否充足。

综合上述两方面原因，LPD 术中离断胰腺颈部的的位置在学界存在争议。既往一份回



1  
2  
3  
4 回顾性研究表明，在距离肠系膜上静脉-门静脉左侧缘 7mm 处离断胰腺颈部是 POPF 的保护  
5  
6 性因素。但该结论有待进一步前瞻性随机对照试验研究证实。

7  
8 因此，本研究项目拟通过开展回顾性及前瞻性两部分研究工作探究腹腔镜胰十二指肠  
9  
10 肠切除术中胰颈离断位置与术后胰瘘发生的相关性关系。

## 11 12 13 2. 如果参加研究，您需要做什么？

14  
15 您首次住院期间除常规诊疗过程外无特殊额外工作。首次手术后 3 月内需按医生要  
16  
17 求进行随访。受试期间，您可能随机被分配到对照组和实验组。对照组在 LPD 术中将在  
18  
19 门静脉-肠系膜上静脉正前方离断胰腺颈部；实验组 LPD 术中将在门静脉-肠系膜上静脉  
20  
21 左侧缘 0.5-1.0cm 处离断胰腺颈部。

## 22 23 24 3. 可供选择的诊疗方案有哪些？

25  
26 患者为可切除的胆总管下段、十二指肠壶腹周围、胰腺头部良恶性肿瘤。其中良性  
27  
28 肿瘤患者可选择的其他诊疗方法包括：定期随访保守观察治疗。依据现有指南，可切除  
29  
30 的恶性肿瘤患者首选手术切除，无其他诊疗方法推荐。

## 31 32 33 4. 哪些人不宜参加研究？

34  
35 如果您为 1) 临界可切除及不可切除恶性肿瘤患者 2) 行新辅助放化疗患者 3) 术  
36  
37 前影像学判断肿瘤超过胃十二指肠动脉水平患者 4) 术中探查发现肿瘤与门静脉-肠系膜  
38  
39 上静脉粘连，需行血管切除重建患者 5) 术中中转开腹患者 6) 术中探查后转行其他手  
40  
41 术方式患者，则不宜参加本研究。7) 根据《住院患者营养风险筛查 2002 (NRS2002)》  
42  
43 标准评分，营养风险评分 < 3 分。

## 44 45 46 5. 参加研究有哪些风险？

47  
48 参加研究，患者将面临行腹腔镜胰十二指肠切除术常规面临的麻醉风险及手术风  
49  
50 险，具体包括：

### 51 52 A. 麻醉风险

53  
54 1) 麻醉过程中可能进行以下某一项或多项操作，包括气管插管、椎管内穿刺、周  
55  
56 围神经阻滞、深静脉穿刺置管术、动脉穿刺置管术、喉罩插入、气管切开术、气管和支  
57  
58 气管镜检查、食管超声波检查、有创血液动力学监测等。这些操作均可能引起组织出血、  
59  
60 神经损伤、创伤、感染、坏死等。

2) 根据麻醉操作常规, 按照《中华人民共和国药典》要求使用各种、各类麻醉药后, 病人可能出现中毒、过敏、高敏、神经毒性等反应, 导致休克、严重脏器功能损害、呼吸心跳停止, 甚至生命危险。已麻醉时, 特别是急症和饱腹病人发生胃内容物反流、误吸、喉痉挛、呼吸道梗阻、神经反射性休克和心律失常等而致重要脏器功能损害, 危及生命。

3) 气管插管可引起牙齿脱落、口唇、舌、咽喉、声带、气管和支气管损伤, 喉痉挛、气管痉挛、支气管痉挛及功能损害。气管插管困难通气不能维持时, 可能需要进行紧急气管切开术, 缺氧时可危及生命。

4) 椎管内麻醉及区域麻醉发生神经、血管、脊髓等组织结构损伤, 可能出现全脊髓麻醉、截瘫、椎管内感染、血肿、腰痛、头痛、肢体伤残、甚至呼吸心跳停止等危及生命。

5) 患者本身合并其他疾病或有重要脏器损害者, 相关并发症和麻醉危险性显著增加。

6) 麻醉方法的选择和改变由实施麻醉的医师根据病情和手术的需要决定。 7) 可能发生术中知晓和术后回忆。

8) 其它发生率极低或难以预料的意外和并发症, 以及其它不可预料的不良后果。

9) 麻醉手术中输血输液可能发生致热源反应、过敏反应、血源性传染病等。

#### B. 手术风险

1) 术中损伤神经、血管及邻近器官, 如: 脾、胃肠道、肾脏、肾上腺等。

2) 术中大出血, 导致失血性休克, 严重者死亡(脾动/静脉、门静脉损伤)。

3) 伤口积液、血肿、感染、裂开、延迟愈合或不愈合, 瘘管及窦道形成, 切口疝。

4) 术后乳糜瘘, 需长时间保持引流管通畅或经皮穿刺引流, 需长时间药物治疗(生长抑素或生长抑素类似物), 症状严重者需介入、手术等侵入性治疗, 严重者可能导致死亡。

5) 术后胆漏, 胆肠吻合口瘘, 需行腹腔通畅引流, 部分胆瘘可自愈, 若常规治疗以及引流无效、病情恶化时, 需行手术治疗。

6) 术后手术部位或腹腔出血, 可能需要行介入治疗, 必要时再次手术。

7) 术后腹腔积液, 腹膜炎, 腹腔感染, 甚至腹腔脓肿, 需再次手术可能。

8) 术后胰瘘, 若出现临床相关胰瘘, 不排除二次穿刺甚至再次手术治疗, 甚至危及患者生命。

- 1
- 2
- 3
- 4 9) 术后肠粘连，粘连性肠梗阻。
- 5
- 6 10) 营养性并发症：营养不良、体重减轻、贫血、腹泻和脂肪泻、代谢性骨病。
- 7
- 8 11) 脑并发症：脑血管意外、癫痫。
- 9
- 10 12) 呼吸并发症：肺不张、肺感染、胸腔积液、气胸等。
- 11
- 12 13) 心脏并发症：心律失常、心肌梗死、心衰、心跳骤停。
- 13
- 14 14) 血栓性静脉炎，以致肺栓塞、脑栓塞或其他部位栓塞。
- 15
- 16 15) 多脏器功能衰竭（包括弥漫性血管内凝血）。
- 17
- 18 16) 水电解质平衡紊乱。
- 19
- 20 17) 诱发原有疾病恶化。
- 21
- 22 18) 术中胃肠道损伤，导致术后胃肠漏，胃肠吻合口瘘可能。
- 23
- 24 19) 术后胃排空障碍，出现术后腹胀、恶心、呕吐。
- 25
- 26 20) 术后门静脉系统、肠系膜血管血栓形成。
- 27
- 28 21) 胰性脑病。
- 29
- 30 22) 术后成人呼吸窘迫综合症（ ARDS ）。
- 31
- 32 23) 术后胰腺外分泌功能不全，导致血糖升高、甚至糖尿病可能。
- 33
- 34 24) 术后胰腺内分泌功能不全，导致消化吸收功能障碍，导致顽固性腹泻等。
- 35
- 36 25) 术后胰源性门静脉高压症，导致消化道大出血等。
- 37
- 38 26) 术后胰源性胸水和腹水。
- 39
- 40 27) 若为恶性肿瘤，肿瘤切除术后复发，远处转移。
- 41
- 42 28) 术后胃肠道出血，应激性溃疡，严重者死亡。
- 43
- 44 29) 如果卧床时间较长可能导致肺部感染，泌尿系统感染，褥疮，深静脉血栓及肺
- 45 栓塞、脑栓塞等。
- 46
- 47 30) 术后远期并发症：胆肠吻合术后可发生胆肠吻合口狭窄、胆管结石、胆管炎、
- 48 肝脓肿；胃部分切除及胃肠吻合术后可能导致营养不良、吻合口溃疡、消化道出血、倾
- 49 倒综合征；胰腺切除及胰肠吻合术后可能导致胰腺内分泌及外分泌功能不全、胰肠吻合
- 50 口狭窄、慢性胰腺炎、胰管结石。
- 51
- 52
- 53
- 54 31) 术后诊断可能与术中冰冻检查结果不一致，最终诊断根据术后病理结果决定。
- 55
- 56 32) 其它目前无法预料的风险和并发症。
- 57
- 58
- 59
- 60

#### 6. 研究过程中受试者出现上述不良事件时，将如何处理？

若发生不良事件应及时由医生或患者报告给研究者，研究者在病例报告表的相应位置做详细记录，研究者应在尊重患者意愿及选择的前提下协助患者积极处理不良事件，争取获得最佳的预后。同时对可能发生的不良事件进行预防。若发生严重不良事件时，研究者及医护人员将按照严重不良事件救治预案进行处理：报告：研究者向科室负责人及医院值班人员报告不良事件性质，并在 24 小时内报告伦理委员会及相关主管部门。及时救治受试者：一旦发生严重不良事件，根据受试者具体不良事件情况迅速采取相应诊疗措施，对受试者进行抢救，必要时送 ICU 诊治。记录：研究者在原始病案和 CRF 表中记录受试者的症状、体征、实验室检查，严重不良事件出现时间、持续时间、程度、处理措施和经过，保证记录完整、真实、准确、及时。填写严重不良事件报告表。随访：研究者对受试者不良事件进行随访，根据病情决定随访时间，在随访过程中给予必要的处理及治疗措施，确保将受试者损害降至最低，充分保证受试者安全。并且详细记录随访经过和处理结果。当发生严重不良事件时，研究将对受试者进行及时救治，并依据相关法律法规给予适当补偿。

#### 7. 参加研究有哪些可能的益处？

参加本项研究，您的病情有可能获得改善，本项研究还有助于确定哪种治疗方法可以更安全有效地治疗与您具有相似病情的其他病人。

#### 8. 参加研究需要支付有关费用吗？

研究员将应当公平、合理地选择受试者。除需要支付诊疗过程中产生的费用外，受试者参加本研究不支付其他任何费用。

#### 9. 个人信息是保密的吗？

您的研究资料将保存在四川大学华西医院，研究者、研究主管部门、伦理审查委员会可查阅您的医疗记录。任何有关本项研究结果的公开报告将不会披露您的个人身份。我们将在法律允许的范围内，尽一切努力保护您个人医疗资料的隐私和个人信息。

#### 10. 我必须参加研究吗？

参加本项研究是完全自愿的，您可以拒绝参加研究，或在试验的任何阶段随时退出本研究而不会受到歧视和报复，其医疗待遇与权益不受影响。如果您决定退出本研究，请与您的医生联系，以便妥善诊疗疾病。

1  
2  
3  
4  
5  
6  
7  
8  
9  
10  
11  
12  
13  
14  
15  
16  
17  
18  
19  
20  
21  
22  
23  
24  
25  
26  
27  
28  
29  
30  
31  
32  
33  
34  
35  
36  
37  
38  
39  
40  
41  
42  
43  
44  
45  
46  
47  
48  
49  
50  
51  
52  
53  
54  
55  
56  
57  
58  
59  
60

---

**受试者声明：**我已经阅读了上述有关本研究的介绍，我的研究人员已向我充分解释和说明了本研究的目的是、操作过程以及参加本研究可能存在的风险和潜在的获益，并回答了我所有相关问题。自愿参加本研究。

我同意  或拒绝  除本研究以外的其他研究利用我的研究资料和生物标本。

受试者正楷姓名： \_\_\_\_\_

受试者签名： \_\_\_\_\_ 日期： \_\_\_\_ 年 \_\_\_\_ 月 \_\_\_\_ 日

受试者的联系电话： \_\_\_\_\_ 手机号： \_\_\_\_\_

法定代理人正楷姓名： \_\_\_\_\_ （如适用）

与受试者关系： \_\_\_\_\_

法定代理人签名： \_\_\_\_\_ 日期： \_\_\_\_ 年 \_\_\_\_ 月 \_\_\_\_ 日

需法定代理人签署的原因： \_\_\_\_\_

见证人正楷姓名： \_\_\_\_\_ （如适用）

见证人签名： \_\_\_\_\_ 日期： \_\_\_\_ 年 \_\_\_\_ 月 \_\_\_\_ 日

需见证人签署的原因： \_\_\_\_\_

**医生声明：**我已对上述参加本研究的自愿者说明了该项研究的有关细节，并且为他/她提供一份签署过的知情同意书的原件。我确认已向受试者详细解释了本研究的情况，特别是参加本研究可能产生的风险与受益、免费与补偿、损害与赔偿、自愿与保密等伦理原则和要求。

医生签名： \_\_\_\_\_ 日期： \_\_\_\_ 年 \_\_\_\_ 月 \_\_\_\_ 日

医生的联系电话： \_\_\_\_\_

四川大学华西医院生物医学伦理审查委员会 联系电话： 028-85422654, 028-85423237

# BMJ Open

## Extended pancreatic neck transection versus conventional pancreatic neck transection during laparoscopic pancreaticoduodenectomy (LPDEXCEPT): protocol for a multicenter superiority randomised controlled trial

|                                 |                                                                                                                                                                                                                                                                                                                                                                                                                                                                                                                                                                                                                                                                                                                                                                                                                                                                                                                                                                                                                                                                                                                                                                                                                                                                                                                                                                                                |
|---------------------------------|------------------------------------------------------------------------------------------------------------------------------------------------------------------------------------------------------------------------------------------------------------------------------------------------------------------------------------------------------------------------------------------------------------------------------------------------------------------------------------------------------------------------------------------------------------------------------------------------------------------------------------------------------------------------------------------------------------------------------------------------------------------------------------------------------------------------------------------------------------------------------------------------------------------------------------------------------------------------------------------------------------------------------------------------------------------------------------------------------------------------------------------------------------------------------------------------------------------------------------------------------------------------------------------------------------------------------------------------------------------------------------------------|
| Journal:                        | <i>BMJ Open</i>                                                                                                                                                                                                                                                                                                                                                                                                                                                                                                                                                                                                                                                                                                                                                                                                                                                                                                                                                                                                                                                                                                                                                                                                                                                                                                                                                                                |
| Manuscript ID                   | bmjopen-2023-078092.R1                                                                                                                                                                                                                                                                                                                                                                                                                                                                                                                                                                                                                                                                                                                                                                                                                                                                                                                                                                                                                                                                                                                                                                                                                                                                                                                                                                         |
| Article Type:                   | Protocol                                                                                                                                                                                                                                                                                                                                                                                                                                                                                                                                                                                                                                                                                                                                                                                                                                                                                                                                                                                                                                                                                                                                                                                                                                                                                                                                                                                       |
| Date Submitted by the Author:   | 25-Nov-2023                                                                                                                                                                                                                                                                                                                                                                                                                                                                                                                                                                                                                                                                                                                                                                                                                                                                                                                                                                                                                                                                                                                                                                                                                                                                                                                                                                                    |
| Complete List of Authors:       | <p>You, Jiaying; Sichuan University West China Hospital, Division of Pancreatic Surgery, Department of General Surgery; Sichuan University West China Hospital, WestChina-California Research Center for Predictive Intervention</p> <p>Zhang, Jing; Sichuan University West China Hospital, Division of Pancreatic Surgery, Department of General Surgery</p> <p>Cai, He; Sichuan University West China Hospital, Division of Pancreatic Surgery, Department of General Surgery</p> <p>Wang, Xin; Sichuan University West China Hospital, Division of Pancreatic Surgery, Department of General Surgery</p> <p>Wang, Hongjian; Sichuan University West China Fourth Hospital, West China School of Public Health</p> <p>Li, Yongbin; Sichuan University West China Hospital, Department of Minimal Invasive Surgery, Shangjin Nanfu Hospital</p> <p>Yu, Chao; The Affiliated Hospital of Guizhou Medical University, Department of Hepatobiliary Surgery</p> <p>Wang, Lei; Qilu Hospital of Shandong University, Department of Pancreatic Surgery</p> <p>Zhou, Xu; Shandong Provincial Hospital, Department of Hepatobiliary Surgery</p> <p>Peng, Bing; Sichuan University West China Hospital, Division of Pancreatic Surgery, Department of General Surgery</p> <p>Cai, Yunqiang; Sichuan University West China Hospital, Division of Pancreatic Surgery, Department of General Surgery</p> |
| <b>Primary Subject Heading</b>: | Surgery                                                                                                                                                                                                                                                                                                                                                                                                                                                                                                                                                                                                                                                                                                                                                                                                                                                                                                                                                                                                                                                                                                                                                                                                                                                                                                                                                                                        |
| Secondary Subject Heading:      | Surgery                                                                                                                                                                                                                                                                                                                                                                                                                                                                                                                                                                                                                                                                                                                                                                                                                                                                                                                                                                                                                                                                                                                                                                                                                                                                                                                                                                                        |
| Keywords:                       | Pancreatic surgery < SURGERY, Pancreatic disease < GASTROENTEROLOGY, Randomized Controlled Trial                                                                                                                                                                                                                                                                                                                                                                                                                                                                                                                                                                                                                                                                                                                                                                                                                                                                                                                                                                                                                                                                                                                                                                                                                                                                                               |
|                                 |                                                                                                                                                                                                                                                                                                                                                                                                                                                                                                                                                                                                                                                                                                                                                                                                                                                                                                                                                                                                                                                                                                                                                                                                                                                                                                                                                                                                |

1  
2  
3  
4  
5  
6  
7  
8  
9  
10  
11  
12  
13  
14  
15  
16  
17  
18  
19  
20  
21  
22  
23  
24  
25  
26  
27  
28  
29  
30  
31  
32  
33  
34  
35  
36  
37  
38  
39  
40  
41  
42  
43  
44  
45  
46  
47  
48  
49  
50  
51  
52  
53  
54  
55  
56  
57  
58  
59  
60

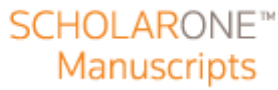



1  
2  
3  
4 • **Title:**  
5

6 Extended pancreatic neck transection versus conventional pancreatic neck transection  
7 during laparoscopic pancreaticoduodenectomy (LPDEXCEPT): protocol for a  
8 multicenter superiority randomised controlled trial.  
9

10  
11  
12 • **Author names and affiliations**  
13

14 Jiaying You<sup>1,2&</sup>, Jing Zhang<sup>1&</sup>, He Cai<sup>1</sup>, Xin Wang<sup>1</sup>, Hongjian Wang<sup>3</sup>, Yongbin  
15 Li<sup>4</sup>, Chao Yu<sup>5</sup>, Lei Wang<sup>6</sup>, Xu Zhou<sup>7</sup>, Bing Peng<sup>1#</sup>, Yunqiang Cai<sup>1#</sup>  
16  
17

18  
19  
20 <sup>1</sup>a, Department of General Surgery, Sichuan University West China Hospital  
21

22 <sup>2</sup> WestChina-California Research Center for Predictive Intervention, Sichuan  
23 University West China Hospital  
24

25 <sup>3</sup> West China School of Public Health, Sichuan University West China Fourth  
26 Hospital,  
27

28 <sup>4</sup> Department of Minimal Invasive Surgery, Shangjin Nanfu Hospital, Sichuan  
29 University West China Hospital  
30

31 <sup>5</sup> Department of Hepatobiliary Surgery, the Affiliated Hospital of Guizhou Medical  
32 University  
33

34 <sup>6</sup> Department of Pancreatic Surgery, Qilu Hospital of Shandong University  
35

36 <sup>7</sup> Department of Hepatobiliary Surgery, Shandong Provincial Hospital  
37

38 & Jiaying You and Jing Zhang contributed equally to this protocol.  
39

40 # Bing Peng and Yunqiang Cai are joint corresponding authors.  
41

42 Yunqiang Cai's E-mail: yunqiangcaiwh@163.com  
43  
44  
45  
46  
47  
48

49 • **Structured abstract:**  
50

51 **Introduction:** Postoperative pancreatic fistula (POPF) remains one of the most  
52 severe complications of laparoscopic pancreaticoduodenectomy (LPD).  
53 Theoretically, transecting the pancreatic neck more distally has both advantages  
54 (more blood supply, and more central pancreatic duct) and disadvantages (maybe  
55  
56  
57  
58  
59  
60



1  
2  
3  
4 smaller the pancreatic duct) in preventing POPF. This theoretical contradiction  
5 pushed us to organize this trial to explore the impact of the level of pancreatic  
6 transection in clinical practice. We conduct this randomised trial with the  
7 hypothesis that extended pancreatic neck transection has superiority to  
8 conventional pancreatic neck transection.  
9

10  
11  
12  
13 **Methods and analysis:** The LPDEXCEPT trial is a multicenter, randomized-  
14 controlled, open-label, superiority trial in 4 centers whose annual surgical volume  
15 for LPD is more than 25 cases with pancreatic surgeons who had completed their  
16 learning curve. A total of 154 patients who meet the inclusive and exclusive criteria  
17 are randomly allocated to the extended pancreatic neck transection group or  
18 conventional pancreatic neck transection group in a 1:1 ratio. The stratified  
19 randomised block design will be applied, with stratified factors are surgical center  
20 and the diameter of the main pancreatic duct measured by preoperative CT scan  
21 (preMPD). The primary outcome is the incidence of the clinically relevant  
22 pancreatic fistula.  
23

24  
25  
26  
27  
28  
29  
30  
31  
32  
33 **Ethics and dissemination:** Ethics Committee on Biomedical Research of West  
34 China Hospital of Sichuan University has approved this trial in March  
35 2023(Approval No.2023-167). Results of this trial will be published in peer-  
36 reviewed journals and conference proceedings.  
37

38  
39  
40  
41 **Registration details:** ClinicalTrials.gov: NCT05808894  
42

43 • **Strengths and limitations of this study**  
44

- 45  
46  
47  
48  
49  
50  
51  
52  
53  
54  
55  
56  
57  
58  
59  
60
1. This study was designed as a multicenter, randomised, controlled, open-label, superiority trial with two parallel groups, and had been registered internationally.
  2. The patients in the study group obtain extended pancreatic neck transection during LPD, transecting the pancreatic neck at more than 5 mm and less than 10 mm beyond the left side of the portal vein. And the patients in the control group obtain conventional pancreatic neck transection, transecting the pancreatic neck above the mesenteric-portal axis.
  3. This study applied stratified randomised block design, whose stratified factors

1  
2  
3  
4 are surgical center and the diameter of the main pancreatic duct measured by the  
5 preoperative abdominal CT scan. This will balance possible bias among research  
6 centers and pancreatic features.  
7

8  
9 4. The main limitation is that this study is carried out by a large team of researchers,  
10 including surgeons, radiologists, pathologists, data collectors, and statisticians. The  
11 coordination of this team is a big challenge.  
12

13  
14 5. LPDEXCEPT is an open-label trial, however, the primary and secondary  
15 outcomes are objective conditions which cannot be influenced by researchers.  
16  
17

## 18 19 20 21 • **Introduction**

22  
23 Pancreaticoduodenectomy is the standard procedure for patients with malignant or  
24 benign tumors of the pancreatic head, the lower common bile duct, and the  
25 periampullary area of the duodenum. Since Gagner and his colleagues performed and  
26 introduced the first total laparoscopic pancreaticoduodenectomy (LPD) in 1994[1],  
27 LPD has become progressively acknowledged for its advantages such as less bleeding,  
28 less pain, and faster recovery [2-4].  
29

30  
31 Despite the advances in laparoscopic technology, postoperative pancreatic fistula  
32 (POPF) remains one of the most severe complications of LPD, which occurs in around  
33 20% of patients [4,5]. POPF is typically associated with secondary complications, such  
34 as post-pancreatectomy hemorrhage, intra-abdominal infection. These could lead to  
35 prolonged length of hospital stay, increased hospital cost, and even death [6,7].  
36 Therefore, prevention of POPF has always been of high priority in pancreatic surgery.  
37 Theoretically, the level of pancreatic transection can significantly affect the occurrence  
38 of POPF by influencing both the blood supply to the anastomosis and the location of  
39 the main pancreatic duct in the pancreatic transverse section, and maybe also the size  
40 of pancreatic duct. The head of the pancreas is supplied by the anterior and posterior  
41 pancreaticoduodenal arterial arcades which are formed by branches from the celiac  
42 trunk and the superior mesenteric artery. The body and tail of the pancreas are supplied  
43 by branches from the splenic artery [8]. And there is an intermediate zone lacking  
44  
45  
46  
47  
48  
49  
50  
51  
52  
53  
54  
55  
56  
57  
58  
59  
60

proper vascularization in the neck of the pancreas, called “vascular watershed” [8]. Therefore, the level of pancreatic neck transection might influence the pancreatic stump vascularization. Strasberg et al. have studied the impact of the defects of pancreatic stump vascularization on POPF and showed there is a statistically significant correlation [9,10]. The main pancreatic duct arises in the tail of the pancreas, and lies midway between the superior and inferior margins and slightly more posterior than anterior through the tail and body of the pancreas. Then it turns caudad and posterior on reaching the head of the pancreas [8]. Therefore, the level of pancreatic neck transection could influence the location of the main pancreatic duct in the pancreatic transverse section. Several studies had revealed the association between the location of the pancreatic duct and POPF [11,12]. And they found the risk of POPF was reduced when the center of pancreatic duct is far from the edge of pancreas. And the more distally the surgeon transect the pancreas, the smaller pancreatic duct he (or she) would get. As the small size of the pancreatic duct is the major risk factor for POPF, transecting the pancreatic neck more distally maybe has disadvantages in preventing POPF.

Bardol et al. conducted a retrospective cohort study and consolidated that long remnant pancreatic neck could be an independent risk factor for POPF after pancreaticoduodenectomy [13]. However, to date, there exists no randomised trial dedicated to answering whether patients could benefit from extended pancreatic neck transection. The above theoretical contradiction pushed us to organize a trial to explore the impact of the level of pancreatic transection in clinical practice. Thus, we conduct this multicenter randomised trial, LPDEXCEPT, with the hypothesis that extended pancreatic neck transection has superiority to conventional pancreatic neck transection.

## • **Methods and analysis**

We wrote this protocol in line with the Standard Protocol Item Recommendation for Interventional Trials (SPIRIT) 2013 guideline [14].

### **Design**

1  
2  
3  
4 The LPDEXCEPT trial was designed as a multicenter, randomised, controlled, open-  
5 label, superiority trial with two parallel groups. The broad goal of this trial is to evaluate  
6 the superiority of extended pancreatic neck transection during LPD. The flow diagram  
7 for LPDEXCEPT was shown as figure 1.  
8  
9  
10

### 11 **Patients and public involvement**

12  
13 Neither patients nor the public are involved in design, recruitment, or conduct of this  
14 study.  
15  
16

### 17 **Study population**

18  
19 All patients with an indication for elective LPD will be evaluated. The reasons for  
20 laparoscopic approach is the only choice for this trial but not open or robotic are as  
21 follows: There are many aspects that differ between open and minimally invasive  
22 (laparoscopic and robotic) pancreaticoduodenectomy, including some of the  
23 postoperative complications, duration of surgery, intraoperative bleeding, length of  
24 hospitalization, and so on [15-18]. And it is still up for debate to choose the approach.  
25 Studies would inevitably introduce additional confounding factors once multiple  
26 approaches are included. The process of study design and study implementation would  
27 also become more complex to eliminate the bias introduced by these confounding  
28 factors. In order to control for these biases more simply and to obtain more accurate  
29 and trustworthy results, also because laparoscopic surgery is practiced more in our  
30 research team, we chose only laparoscopic surgery for this trial. The inclusion and  
31 exclusion criteria for patients are as follows:  
32  
33  
34  
35  
36  
37  
38  
39  
40  
41  
42  
43

#### 44 *Participants inclusion criteria*

- 45  
46 (1) Patients with benign or resectable malignant tumors of the lower common bile  
47 duct, Vater ampulla, head or uncinata process of the pancreas.
- 48  
49 (2) 18 years old < age < 80 years old, no gender limit.
- 50  
51 (3) Patient is expected survival beyond 3 months.
- 52  
53 (4) No pregnancy or pregnancy plan within 3 months after surgery.
- 54  
55 (5) Nutrition risk score <3 according to the Nutritional Risk Screening for  
56 Inpatients 2002 (NRS2002) standard score [19].  
57  
58  
59  
60

- (6) No contraindication to surgery for anesthetic evaluation.
- (7) The subjects voluntarily joined the study and signed an informed consent form, with good compliance and cooperation with follow-up.

#### *Participants exclusion criteria*

- (1) Patients with borderline resectable and unresectable malignancies according to the National Comprehensive Cancer Network (NCCN) and the General Office of National Health Commission clinical practice guidelines [20,21].
- (2) Patients undergoing neoadjuvant chemotherapy or radiotherapy, because these patients routinely undergo open surgery in our research team.
- (3) Patients with tumors exceeding the level of the gastroduodenal artery as measured by preoperative radiography.
- (4) Intraoperative exploration reveals tumor adhesions with portal vein-superior mesenteric vein, requiring revascularization and reconstruction.
- (5) Operation transfers to open.
- (6) Operation transfers to other procedure.
- (7) The duct-to-mucosa pancreaticojejunostomy is not performed due to the main pancreatic duct cannot be found intraoperatively.

#### **Interventions**

##### *Study group: Extended transection group*

The patients in extended transection group obtain extended pancreatic neck transection during LPD. Surgeons will transect the pancreatic neck at more than 5 mm and less than 10 mm beyond the left side of the portal vein.

##### *Control group: Conventional transection group*

The patients in conventional transection group obtain conventional pancreatic neck transection during LPD. Surgeons will transect the pancreatic neck above the mesenteric-portal axis.

Figure 2 illustrates the level of the pancreatic neck transection of the two groups.

#### **Outcomes**

##### *Primary outcome measures*

1  
2  
3  
4 The primary outcome is the incidence of the CR-POPF according to the International  
5 Study Group of Pancreatic Surgery's (ISGPS) definition and grading [22].  
6

#### 7 *Secondary Outcome Measures*

8  
9 The secondary objective of this trial is to compare the incidence of postoperative  
10 morbidity (Clavien-Dindo score  $\geq 3$ ), the location of pancreatic duct, the surgical  
11 performance of pancreatojejunostomy, and the short-term and long-term pancreatic  
12 endocrine and exocrine function between the two groups. Thus, the secondary outcomes  
13 include the location of the pancreatic duct in the pancreatic transverse section, the  
14 duration of pancreatojejunostomy, postoperative morbidity, mortality within 3  
15 months postoperatively, and the pancreatic endocrine and exocrine function of the  
16 participants at the third month postoperatively and at the first year postoperatively. The  
17 location of the pancreatic duct in the pancreatic transverse section will be measured by  
18 the way described as following: Before performing the pancreatojejunostomy, place  
19 the pancreatic transverse section in the central position of the lens. Measure the  
20 anterior-posterior diameter of the pancreas and the distance of the pancreatic duct from  
21 the back of the pancreas. The location of the pancreatic duct in the pancreatic transverse  
22 section is equal to the ratio of the distance of the pancreatic duct from the back of the  
23 pancreas to the anterior-posterior diameter of the pancreas. Postoperative morbidity  
24 will be classified according to the Clavien-Dindo score [23]. For endocrine function,  
25 we detect diabetes mellitus development, and the diagnosis and classification of  
26 diabetes mellitus is according to the international criteria of diabetes [24]. For  
27 pancreatic exocrine function, we defined pancreatic exocrine insufficiency as that stool  
28 evacuation was  $>3$  times/day, and pasty or greasy stool was noted, associated with  
29 patient's weight loss, and there was a need for enzyme supplementation resulting in  
30 recovery of bowel movements and cessation of steatorrhea [25], considering that not  
31 all research centers can measure fecal elastase, N-benzol-L-tyrosyl-p-aminobenzoic  
32 acid (BT-PABA), or fecal chymotrypsin.  
33  
34  
35  
36  
37  
38  
39  
40  
41  
42  
43  
44  
45  
46  
47  
48  
49  
50  
51  
52  
53  
54  
55

#### 56 **Participating surgeons and hospital criteria**

57  
58 The trials will be conducted in tertiary care hospitals and academic hospitals.  
59  
60

1  
2  
3  
4 Participating hospitals must be high-volume medical center whose annual surgical  
5 volume for LPD is more than 25 cases, according to the consensus on LPD [26].  
6  
7 Participating surgeons must have completed their learning curve for LPD. We defined  
8 that a surgeon who had performed more than 104 cases of laparoscopic  
9 pancreaticoduodenectomy is considered to have passed the learning curve, according  
10 to the study about practice patterns of laparoscopic pancreaticoduodenectomy  
11 conducted by Wang et al [27].  
12  
13  
14  
15  
16

### 17 **Surgical technique details**

18 All study centers will perform the LPD using the optimization of operative procedure.  
19 The specific operating procedures and details are reported in our previous articles [28].  
20  
21 In this study, the surgical operation required attention to the following operational  
22 details: Firstly, mark the level of the transection on the surface of the pancreas  
23 according to the group of participants before transecting the pancreatic neck, and after  
24 dissecting the upper and lower margins of the pancreas and revealing the superior  
25 mesenteric vein and portal vein. The level of transection in extended transection group  
26 is at more than 5 mm and less than 10 mm beyond the left side of the portal vein, while  
27 it in the conventional transection group is at the mesenteric-portal axis. Secondly, make  
28 sure not to pull on the pancreas and surrounding tissue, and make sure the pancreas is  
29 in situ when marking. Thirdly, mark the pancreas from the superior margin to the  
30 inferior margin completely with an electrocoagulation hook, and transect the pancreas  
31 along the mark to prevent deviation.  
32  
33  
34  
35  
36  
37  
38  
39  
40  
41  
42  
43

### 44 **Sample size**

45 The sample size was determined based on the primary objective of comparing the  
46 incidence of CR-POPF between the two groups. According to the retrospective  
47 study[13], extended pancreatic neck transection ( $\geq 7$ mm) was associated with a lower  
48 incidence of CR-POPF than conventional pancreatic neck transection (15.4% vs.  
49 33.3%). Considering this study is a superiority trial, using the one-sided test with 80%  
50 power ( $1-\beta$ ) at a significance level of 5% ( $\alpha$ ), the minimal sample size needed to detect  
51  
52  
53  
54  
55  
56  
57  
58  
59  
60

1  
2  
3  
4 a significant difference is calculated to be 70 patients in each group. Considering the  
5 loss of follow-up and washout, we enlarged the sample size by 10%. Then, there are 77  
6 patients in each group, and the final sample size is 154 patients.  
7  
8

9  
10 **Participant timeline.**

11 The trial time schedule of enrolment is estimated to be a 3-year period, followed by a  
12 1-year follow-up visit after discharge from the hospital. Once the eligibility of the  
13 patients is confirmed, randomization will be applied. The intervention will be applied  
14 intraoperatively. The assessment and visits for patients will be mandatory in the first  
15 month, third month, and first year with either telephone or in-hospital follow-up. The  
16 participant timeline was shown in the Table 1.  
17  
18  
19  
20  
21  
22  
23  
24  
25  
26  
27  
28  
29  
30  
31  
32  
33  
34  
35  
36  
37  
38  
39  
40  
41  
42  
43  
44  
45  
46  
47  
48  
49  
50  
51  
52  
53  
54  
55  
56  
57  
58  
59  
60



1  
2  
3  
4  
5  
6  
7  
8  
9  
10  
11  
12  
13  
14  
15  
16  
17  
18  
19  
20  
21  
22  
23  
24  
25  
26  
27  
28  
29  
30  
31  
32  
33  
34  
35  
36  
37  
38  
39  
40  
41  
42  
43  
44  
45  
46  
47  
48  
49  
50  
51  
52  
53  
54  
55  
56  
57  
58  
59  
60

For peer review only

Table 1: Participant timeline and data collection for LPDEXCEPT

| Time point<br><br>Items      | Study period                              |            |                  |                                     |                                          |                                          |                                                          |
|------------------------------|-------------------------------------------|------------|------------------|-------------------------------------|------------------------------------------|------------------------------------------|----------------------------------------------------------|
|                              | preoperative<br>eligibility<br>assessment | allocation | intraoperatively | Before discharge<br>postoperatively | Follow-up                                |                                          | Close-out<br><br>1 <sup>st</sup> year<br>postoperatively |
|                              |                                           |            |                  |                                     | 1 <sup>st</sup> month<br>postoperatively | 3 <sup>rd</sup> month<br>postoperatively |                                                          |
| Patient demographics         | ✓                                         |            |                  |                                     |                                          |                                          |                                                          |
| Informed consent             | ✓                                         |            |                  |                                     |                                          |                                          |                                                          |
| Blood routine                | ✓                                         |            |                  | ✓                                   |                                          |                                          |                                                          |
| Coagulation routine          | ✓                                         |            |                  |                                     |                                          |                                          |                                                          |
| Blood biochemistry           | ✓                                         |            |                  | ✓                                   |                                          |                                          |                                                          |
| Enhanced CT scan             | ✓                                         |            |                  | ✓                                   |                                          |                                          |                                                          |
| Allocation record            |                                           | ✓          |                  |                                     |                                          |                                          |                                                          |
| Surgical videos              |                                           |            | ✓                |                                     |                                          |                                          |                                                          |
| Surgical record              |                                           |            | ✓                |                                     |                                          |                                          |                                                          |
| Postoperative records        |                                           |            |                  | ✓                                   | ✓                                        | ✓                                        | ✓                                                        |
| Histopathological findings   |                                           |            |                  | ✓                                   | ✓                                        |                                          |                                                          |
| Other therapy (if necessary) |                                           |            |                  | ✓                                   | ✓                                        | ✓                                        | ✓                                                        |

Patient demographics includes date of admission, year of birth, sex, body mass index, previous surgical history, preoperative biliary drainage, Nutrition risk score, WHO-ECOG score, location of the tumor, diameter of the tumor, diameter of the main pancreatic duct, history of neoadjuvant therapy, and pancreatic thickness.

Surgical record includes date of operation, ASA scores, location of the pancreatic neck transection (extended or conventional pancreatic neck transection), pancreatic texture, diameter of the main pancreatic duct, duration of pancreaticojejunostomy anastomosis, duration of the operation, estimated blood loss, whether to convert to open surgery or other procedures, whether to preserve the pylorus, whether to resect and reconstruct the main veins, and variation of vessels.

Postoperative records include blood transfusion, date of soft solid diet, date of drain removal, date of nasogastric tube removal, drain and production amylase, date of discharge, type of complication, reoperation and Clavien-Dindo grade, cost for hospitalization, and short-term and long-term pancreatic exocrine and endocrine function. Histopathological findings include location of the tumor, size of the tumor, histological type, surgical margin status, and the T&N classification and American Joint Committee on Cancer staging (AJCC) for malignant tumors.

1  
2  
3  
4  
5  
6  
7  
8  
9  
10  
11  
12  
13  
14  
15  
16  
17  
18  
19  
20  
21  
22  
23  
24  
25  
26  
27  
28  
29  
30  
31  
32  
33  
34  
35  
36  
37  
38  
39  
40  
41  
42  
43  
44  
45  
46

Other therapy includes readmission, treatment for any surgical complications, adjuvant therapy for malignant tumors, and the cost for readmission.

For peer review only

## Recruitment

The recruiters in each center will screen eligible patients through the outpatient department or inpatient department. The duration of the recruitment period is estimated to be a 36-month interval depending on each center's recruiting rate. No financial incentives will be provided to trial investigators or patients for enrolment in the recruitment period.

## Randomization and allocation.

Stratified randomised block design with a block number of four will be applied. The stratified factors are surgical center and the diameter of the main pancreatic duct measured by the preoperative abdominal CT scan (preMPD). Due to pancreatic duct diameter is the main risk factor for pancreatic fistula [29], we included pancreatic duct diameter as a stratification factor. Also, because of the differences in healthcare delivery and quality, the study center was included as another stratification factor, which could allow extrapolability of the study results to other hospitals. According to classification made by the ISGPS [29], the patients will be stratified into preMPD  $\leq 3$  mm and preMPD  $> 3$  mm. Although pancreatic texture is also another major risk factor for pancreatic fistula, this study did not set it as a stratified factor for the following reasons: firstly, although there have been a few studies that have attempted to use CT values to represent pancreatic texture, there is a lack of a more recognized method to accurately assess pancreatic texture preoperatively [30,31]. Secondly, pancreatic texture is not only determined by the type of pathologic diagnosis, but is also influenced by the site of the tumor, size of the tumor, and so on. Besides, it is also difficult to accurately determine the pathologic diagnosis preoperatively, especially to differentiate the CT manifestations of chronic mass pancreatitis and pancreatic adenocarcinoma, both of whose pancreatic texture is firm. Thirdly, too many stratification factors can add to the difficulties in the implementation of the study. Thus, we did not consider the pancreatic texture or pathologic diagnosis as the stratification factor.

1  
2  
3  
4 A data manager generated the randomization lists by computer system. The  
5 randomization lists will not be available to surgeons, recruiters, and data collectors.  
6  
7 And the randomization lists will be embedded in a password-protected mobile  
8 application which was created to collect and manage data by our study team. The  
9 randomization will be centralised through the mobile application. Allocation of each  
10 patient will be announced to the surgeon by the mobile application only after the  
11 assessment of baseline information of the patients and the upload of the signed informed  
12 consent.  
13  
14  
15  
16  
17  
18

### 19 **Blinding**

20  
21 The patients, surgeons, data collectors, outcome assessors and data analysts are  
22 unblinded. The primary outcome of this study is the incidence of CR-POPF. The  
23 definition and the criteria of CR-POPF are objective condition and would not be  
24 influenced by the patients and surgeons even if they are unblinded. And the data  
25 collectors, outcomes assessors and the data analysts are not involved in perioperative  
26 management of the patients. Thus, they have no determination of the CR-POPF.  
27  
28  
29  
30  
31  
32

### 33 **Data collection and management**

34 Baseline characteristics will be recorded before randomization. Intraoperative  
35 information, histopathological information, primary outcome, and secondary outcomes  
36 will be collected after randomization from hospitalization up to 1 year postoperatively.  
37  
38 The detailed data list was shown in the Table 1.  
39  
40  
41

42 We have created a special mobile application to collect and manage study data. The  
43 mobile application and database are password-protect. The investigators and data  
44 collectors are to be qualified to the access the mobile application and the database. Data  
45 collection will be completed in accordance with standard specification processes. The  
46 investigators and data collectors enter the original data into the mobile application.  
47  
48  
49  
50  
51

### 52 **Data monitoring**

53  
54 Data Monitoring Committee (DMC) has been established. It is not competing interests.  
55  
56 Through the combination of our internet-based and instantaneous mobile application,  
57 the DMC will conduct data monitoring to ensure that the reported clinical study data  
58  
59  
60

1  
2  
3  
4 are accurate, complete, and verifiable from source documents throughout the whole trial.  
5  
6 An interim analysis is performed on the primary endpoint when 50% of patients have  
7  
8 been randomised and have completed the 3 months follow-up. The interim analysis is  
9  
10 performed by an independent statistician. The statistician will report to the Ethics  
11  
12 Committee on Biomedical Research of West China Hospital of Sichuan University. The  
13  
14 ethics committee decides on the continuation of the trial.

#### 15 **Harms**

16  
17 An adverse event will be defined as any untoward medical occurrence in a subject  
18  
19 without regard to the possibility of a causal relationship. All adverse events will be  
20  
21 collected and recorded in detail according to the Common Terminology Criteria for  
22  
23 Adverse Events (CTCAE V.4.0) after the subject has provided consent and enrolled in  
24  
25 the study. And the data will be collected by the Ethics Committee on Biomedical  
26  
27 Research of West China Hospital of Sichuan University and the ClinicalTrials.gov  
28  
29 Protocol Registration and Results System.

#### 30 **Protocol amendments.**

31  
32 Any modifications to the protocol which may impact on the conduct of the study,  
33  
34 potential benefit of the patient or may affect patient safety, including changes of study  
35  
36 objectives, study design, patient population, sample sizes, study procedures, or  
37  
38 significant administrative aspects will require a formal amendment to the protocol.  
39  
40 Such amendment will be agreed upon by the Ethics Committee on Biomedical Research  
41  
42 of West China Hospital of Sichuan University. And the health authorities will be  
43  
44 notified in accordance with local regulations.

#### 45 **Auditing.**

46  
47 Auditing will be performed per year, at 50% of the inclusions, and at the end of the  
48  
49 study by the Ethics Committee on Biomedical Research of West China Hospital of  
50  
51 Sichuan University. The auditing will be independent from investigators.

#### 52 **Confidentiality.**

53  
54 All study-related information will be stored securely at the study site. All participant  
55  
56 information will be stored in locked file cabinets in areas with limited access. All  
57  
58  
59  
60

databases will be secured with the password-protected data collection system.

#### **Access to data.**

All participating investigators will be able to access the data of the registry, perform statistical analysis, discuss the results, and write the scientific manuscripts. Project principal investigators will have direct access to their own site's data sets, and will have access to other sites data by request. Data dispersed to project team members will be blinded of any identifying participant information.

#### **Statistical methods**

Statistical analysis will be performed using IBM SPSS statistics Version 25.0 (SPSS Inc., Chicago, IL) and the R programme Version 4.2.1 (R Foundation for Statistical Computing Platform). For continuous variables following a normal distribution, results were reported as the mean  $\pm$  standard deviation (SD) for the data, otherwise, the median with interquartile range (IQR) was reported. Categorical variables were reported as frequency and percentage. The two-side P value  $< 0.05$  was considered statistically significant. The Chi-Squared test or Fisher's exact test will be used to compare the categorical data between the study group and the control group as appropriate. The independent sample T test will be used to compare the continuous variables following a normal distribution between the two groups. And the continuous non-normally distributed variables will be compared using the Mann-Whitney U test. A Logistic regression analysis will be performed to investigate predictors of CR-POPF. All variables with a p value  $< 0.1$  in a univariable analysis are included in the multivariable Logistic regression analysis.

Bias due to missing data will be investigated by comparing the baseline characteristics of participants with and without missing values. Analysis in all randomly assigned patients (intention-to-treat analysis) will be conducted as sensitivity analyses. In addition, multiple imputations will be used to impute missing data, and the imputed data will also be analyzed as part of the sensitivity analyses. The primary and secondary outcomes will also be analyzed in all eligible patients who began the protocol treatment

(per-protocol population), excluding ineligible patients and those not receiving the allocated treatment from all randomly assigned patients.

### • **Ethics and dissemination**

The ethics approval of the trial has been obtained from the Ethics Committee on Biomedical Research of West China Hospital of Sichuan University in March 2023 (Approval No.2023-167). The ethics Committee of each participating centers had accepted the decision of ethical review of the Ethics Committee on Biomedical Research of West China Hospital of Sichuan University. The English and Chinese versions of the informed consent materials were shown in Appendix 1. Trained research surgeons will introduce the trial to patients who have the indication for LPD. Patients will then be able to have an informed discussion with the participating consultant. Research surgeons will obtain written consent from patients willing to participate in the trial before entering the study.

The result of this study will be reported according to the CONSORT2010 guidelines [32]. Any study results will be published in peer-reviewed journals and conference proceedings. The results will be released to the participating physicians, referring physicians, patients, and the general medical community.

### • **References**

1. Gagner M, Pomp A. Laparoscopic pylorus-preserving pancreatoduodenectomy. *Surg Endosc.* 1994;8(5):408-410.
2. de Rooij T, Lu MZ, Steen M, et al. Minimally Invasive Versus Open Pancreatoduodenectomy: Systematic Review and Meta-analysis of Comparative Cohort and Registry Studies. *Ann Surg.* 2016;264(2):257-267.
3. Zhang H, Wu X, Zhu F, et al. Systematic review and meta-analysis of minimally invasive versus open approach for pancreaticoduodenectomy. *Surg Endosc.*



2016;30(12):5173-5184.

4. Nickel F, Haney CM, Kowalewski KF, et al. Laparoscopic Versus Open Pancreaticoduodenectomy: A Systematic Review and Meta-analysis of Randomized Controlled Trials. *Ann Surg.* 2020;271(1):54-66.
5. Klompmaker S, van Hilst J, Wellner UF, et al. Outcomes After Minimally-invasive Versus Open Pancreatoduodenectomy: A Pan-European Propensity Score Matched Study. *Ann Surg.* 2020;271(2):356-363.
6. Smits FJ, Verweij ME, Daamen LA, et al. Impact of Complications After Pancreatoduodenectomy on Mortality, Organ Failure, Hospital Stay, and Readmission: Analysis of a Nationwide Audit. *Ann Surg.* 2022;275(1): e222-e228.
7. Abbott DE, Tzeng CW, McMillan MT, et al. Pancreas fistula risk prediction: implications for hospital costs and payments. *HPB (Oxford).* 2017;19(2):140-146.
8. Skandalakis LJ, Rowe JS, Jr., et al. Surgical embryology and anatomy of the pancreas. *Surg Clin North Am.* 1993;73(4):661-697.
9. Strasberg SM, McNevin MS. Results of a technique of pancreaticojejunostomy that optimizes blood supply to the pancreas. *J Am Coll Surg.* 1998;187(6):591-596.
10. Strasberg SM, Drebin JA, Mokadam NA, et al. Prospective trial of a blood supply-based technique of pancreaticojejunostomy: effect on anastomotic failure in the Whipple procedure. *J Am Coll Surg.* 2002;194(6):746-760.
11. El Nakeeb A, Salah T, Sultan A, et al. Pancreatic anastomotic leakage after pancreaticoduodenectomy. Risk factors, clinical predictors, and management (single center experience). *World J Surg.* 2013;37(6):1405-1418.
12. Yamamoto Y, Sakamoto Y, Nara S, et al. A preoperative predictive scoring system for postoperative pancreatic fistula after pancreaticoduodenectomy. *World J Surg.* 2011;35(12):2747-2755.
13. Bardol T, Delicque J, Hermida M, et al. Neck transection level and postoperative pancreatic fistula after pancreaticoduodenectomy: A retrospective cohort study of 195 patients. *Int J Surg.* 2020; 82:43-50.
14. Chan AW, Tetzlaff JM, Altman DG, et al. SPIRIT 2013 statement: defining

- 1  
2  
3  
4 standard protocol items for clinical trials. *Ann Intern Med.* 2013;158(3):200-207.
- 5  
6 15. Uijterwijk BA, Kasai M, Lemmers DHL, et al. The clinical implication of minimally  
7  
8  
9  
10  
11  
12  
13  
14  
15  
16  
17  
18  
19  
20  
21  
22  
23  
24  
25  
26  
27  
28  
29  
30  
31  
32  
33  
34  
35  
36  
37  
38  
39  
40  
41  
42  
43  
44  
45  
46  
47  
48  
49  
50  
51  
52  
53  
54  
55  
56  
57  
58  
59  
60
15. Uijterwijk BA, Kasai M, Lemmers DHL, et al. The clinical implication of minimally  
invasive versus open pancreatoduodenectomy for non-pancreatic periampullary cancer:  
a systematic review and individual patient data meta-analysis. *Langenbecks Arch Surg.*  
2023;408(1):311. Published 2023 Aug 15.
16. Uijterwijk BA, Wei K, Kasai M, et al. Minimally invasive versus open  
pancreatoduodenectomy for pancreatic ductal adenocarcinoma: Individual patient data  
meta-analysis of randomized trials. *Eur J Surg Oncol.* 2023;49(8):1351-1361.
17. Sattari SA, Sattari AR, Makary MA, Hu C, He J. Laparoscopic versus Open  
Pancreatoduodenectomy in Patients with Periampullary Tumors: A Systematic Review  
and Meta-analysis [published online ahead of print, 2022 Dec 15]. *Ann Surg.*  
2022;10.1097/SLA.0000000000005785.
18. Pfister M, Probst P, Müller PC, et al. Minimally invasive versus open pancreatic  
surgery: meta-analysis of randomized clinical trials. *BJS Open.* 2023;7(2):zrad007.
19. Budzyński J, Tojek K, Czerniak B, et al. Scores of nutritional risk and parameters  
of nutritional status assessment as predictors of in-hospital mortality and readmissions  
in the general hospital population. *Clin Nutr.* 2016;35(6):1464-1471.
20. Chiorean EG, Chiaro MD, Tempero MA, et al. Ampullary Adenocarcinoma,  
Version 1.2023, NCCN Clinical Practice Guidelines in Oncology. *J Natl Compr Canc  
Netw.* 2023;21(7):753-782.
21. General Office of National Health Commission. Standard for diagnosis and  
treatment of pancreatic cancer (2022 edition). *J Clin Hepatol,*2022, 38(5):1006-1015.
22. Bassi C, Marchegiani G, Dervenis C, et al. The 2016 update of the International  
Study Group (ISGPS) definition and grading of postoperative pancreatic fistula: 11  
Years After. *Surgery.* 2017;161(3):584-591.
23. Dindo D, Demartines N, Clavien PA. Classification of surgical complications: a  
new proposal with evaluation in a cohort of 6336 patients and results of a survey. *Ann  
Surg.* 2004;240(2):205-213.
24. American Diabetes Association. Diagnosis and classification of diabetes

- 1  
2  
3  
4 mellitus. *Diabetes Care*. 2013;36 Suppl 1(Suppl 1):S67-S74.
- 5  
6 25. Beger HG, Poch B, Mayer B, Siech M. New Onset of Diabetes and Pancreatic  
7  
8 Exocrine Insufficiency After Pancreaticoduodenectomy for Benign and Malignant  
9  
10 Tumors: A Systematic Review and Meta-analysis of Long-term Results. *Ann Surg*.  
11  
12 2018;267(2):259-270.
- 13  
14 26. Qin R, Kendrick ML, Wolfgang CL, et al. International expert consensus on  
15  
16 laparoscopic pancreaticoduodenectomy. *Hepatobiliary Surg Nutr*. 2020;9(4):464-483.
- 17  
18 27. Wang M, Peng B, Liu J, et al. Practice Patterns and Perioperative Outcomes of  
19  
20 Laparoscopic Pancreaticoduodenectomy in China: A Retrospective Multicenter  
21  
22 Analysis of 1029 Patients. *Ann Surg*. 2021;273(1):145-53.
- 23  
24 28. Li YB, Cai YQ, Wang X, et al. [Optimization of Operative Procedure in Total  
25  
26 Laparoscopic Pancreaticoduodenectomy (with Video)]. *Sichuan Da Xue Xue Bao Yi*  
27  
28 *Xue Ban*. 2020;51(4):446-52.
- 29  
30 29. Schuh F, Mihaljevic AL, Probst P, et al. A Simple Classification of Pancreatic  
31  
32 Duct Size and Texture Predicts Postoperative Pancreatic Fistula: A classification of  
33  
34 the International Study Group of Pancreatic Surgery. *Ann Surg*. 2023;277(3): e597-  
35  
36 e608.
- 37  
38 30. Shi Y, Gao F, Qi Y, et al. Computed tomography-adjusted fistula risk score for  
39  
40 predicting clinically relevant postoperative pancreatic fistula after  
41  
42 pancreatoduodenectomy: Training and external validation of model  
43  
44 upgrade. *EBioMedicine*. 2020;62:103096.
- 45  
46 31. Lapshyn H, Petruch N, Thomaschewski M, et al. A simple preoperative  
47  
48 stratification tool predicting the risk of postoperative pancreatic fistula after  
49  
50 pancreatoduodenectomy. *Pancreatology*. 2021;21(5):957-964.
- 51  
52 32. Moher D, Hopewell S, Schulz KF, et al. CONSORT 2010 explanation and  
53  
54 elaboration: updated guidelines for reporting parallel group randomised trials. *Bmj*.  
55  
56 2010;340:c869.

57  
58 • **Figure legend**  
59  
60

1  
2  
3  
4 Figure 1. Flow diagram for LPDEXCEPT.

5  
6 Figure 2. The level of the pancreatic neck transection of the two groups. The green  
7  
8 dotted line illustrates the level of the pancreatic neck transection. (a). illustrates the level  
9  
10 of the pancreatic neck transection of Conventional transection group, in which surgeons  
11  
12 will transect the pancreatic neck above the mesenteric-portal axis. (b). illustrates the  
13  
14 level of the pancreatic neck transection of Extended transection group, in which  
15  
16 surgeons will transect the pancreatic neck at more than 5 mm and less than 10 mm  
17  
18 beyond the left side of the mesenteric-portal axis.

19  
20  
21 • **Authors' contributions**

22  
23 Bing Peng obtained funding for this study. Yunqiang Cai proposed the  
24  
25 conceptualization. Jiaying You, Jing Zhang, Xin Wang and He Cai designed the  
26  
27 study. Hongjian Wang calculated the sample size. Bing Peng, Yunqiang Cai,  
28  
29 Yongbin Li, Chao Yu, Lei Wang, and Xu Zhou performed the operations. Jiaying  
30  
31 You and Jing Zhang drafted the manuscript. Yunqiang Cai and Bing Peng  
32  
33 contributed to critical revision of the manuscript and approved the final version of  
34  
35 the manuscript. All authors have read and approved the final manuscript.

36  
37 • **Funding statement**

38  
39 This study was supported by 1.3.5 project for disciplines of excellence, West China  
40  
41 Hospital, Sichuan University (2018HXFH015).

42  
43 • **Competing Interests statement**

44  
45 None declared.

46  
47 • **Acknowledgements**

48  
49 We thank Dr. Xinrui Zhu for the support of this study registration.

1  
2  
3  
4  
5  
6  
7  
8  
9  
10  
11  
12  
13  
14  
15  
16  
17  
18  
19  
20  
21  
22  
23  
24  
25  
26  
27  
28  
29  
30  
31  
32  
33  
34  
35  
36  
37  
38  
39  
40  
41  
42  
43  
44  
45  
46  
47  
48  
49  
50  
51  
52  
53  
54  
55  
56  
57  
58  
59  
60

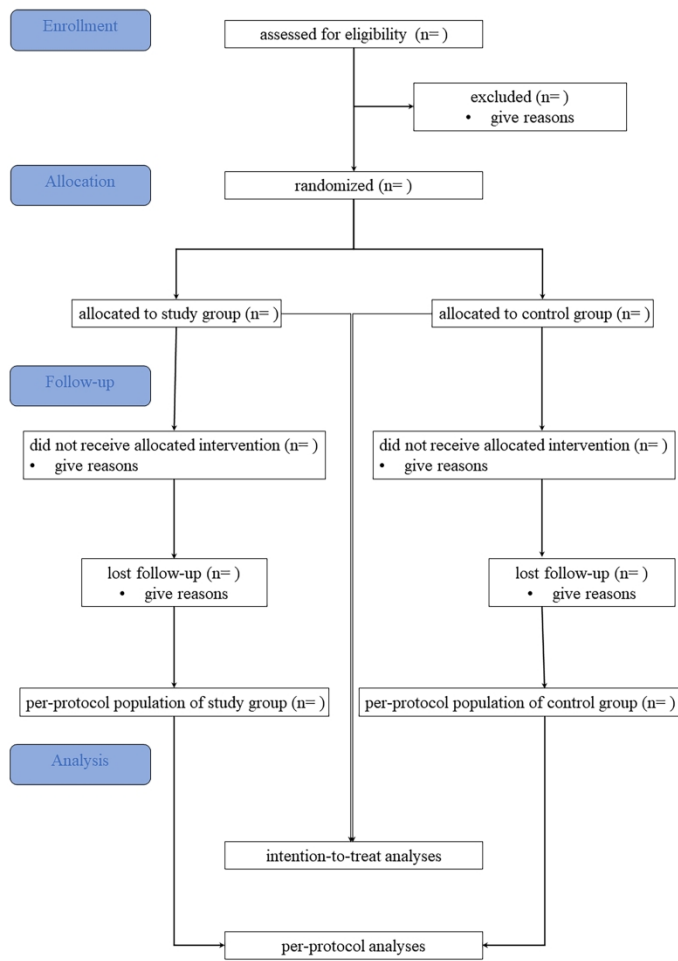

Figure 1. Flow diagram for LPDEXCEPT.

645x1148mm (118 x 118 DPI)

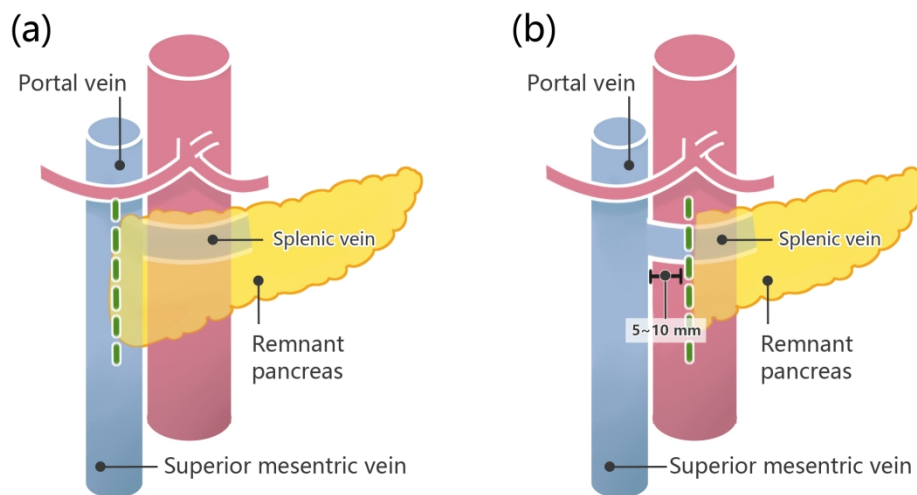

figure 2. The level of the pancreatic neck transection of the two groups. The green dotted line illustrates the level of the pancreatic neck transection. (a). illustrates the level of the pancreatic neck transection of Conventional transection group, in which surgeons will transect the pancreatic neck above the mesenteric-portal axis. (b). illustrates the level of the pancreatic neck transection of Extended transection group, in which surgeons will transect the pancreatic neck at more than 5 mm and less than 10 mm beyond the left side of the mesenteric-portal axis.

98x56mm (600 x 600 DPI)

Informed consent  
Version date: 2023-02-21 version: V2.0

---

Informed Consent for Extended pancreatic neck transection versus conventional pancreatic neck transection during laparoscopic pancreaticoduodenectomy (LPDEXCEPT): a multicenter superiority randomized controlled trial

**Informed page**

Dear Mrs. /Mr.,

Thank you for your interest in our clinical research! We will invite you to participate in a randomized controlled clinical trial of extended pancreatic neck transection versus conventional pancreatic neck transection during laparoscopic pancreaticoduodenectomy (LPDEXCEPT).

Before you decide whether to participate in this study, please read the following as much as possible to help you understand the research, the purpose, the research process, and deadlines, and what may be brought after you participate in this study, which might be benefits, risks or discomfort. If you prefer, you can also discuss it with your family, friends, or ask your doctor for an explanation.

This clinical trial has been approved by the Ethics Committee on Biomedical Research of West China Hospital of Sichuan University (2023-167) in March 2023. And the number of participants in this study is expected to be 154.

## **I. Why to participate in this trial? (Research background and research purposes)**

Pancreaticoduodenectomy is the standard procedure for patients with malignant or benign tumors of the pancreatic head, the lower common bile duct, and the periampullary area of the duodenum. Since Gagner and his colleagues performed and introduced the first total laparoscopic pancreaticoduodenectomy (LPD) in 1994, LPD has become progressively acknowledged for its advantages such as less bleeding, less pain, and faster recovery.

Despite the advances in laparoscopic technology, postoperative pancreatic fistula (POPF) remains one of the most severe complications of LPD, which occurs in around 20% of patients. POPF is typically associated with secondary complications, such as post-pancreatectomy hemorrhage, intra-abdominal infection. These could lead to prolonged length of hospital stay, increased hospital cost, and even death. Therefore, prevention of POPF has always been of high priority in pancreatic surgery.

The level of pancreatic neck transection during LPD is not conclusive. Theoretically, the level of pancreatic transection can significantly affect the occurrence of POPF by influencing both the blood supply to the anastomosis and the location of the main pancreatic duct in the pancreatic transverse section. The head of the pancreas is supplied by the anterior and posterior pancreaticoduodenal arterial arcades which are formed by branches from the celiac trunk and the superior mesenteric artery. The body and tail of the pancreas are supplied by branches from the splenic artery. And there is an intermediate zone lacking proper vascularization in the neck of the pancreas, called “vascular watershed”. Therefore, the level of pancreatic neck transection might influence the pancreatic stump vascularization. Strasberg and his colleagues have studied the impact of the defects of pancreatic stump vascularization on POPF and showed there is a statistically significant correlation. The main pancreatic duct arises in the tail of the pancreas, and lies midway between the superior and inferior margins and slightly more posterior than anterior through the tail and body of the pancreas. Then it

Informed consent  
Version date: 2023-02-21 version: V2.0

---

turns caudad and posterior on reaching the head of the pancreas. Therefore, the level of pancreatic neck transection could influence the location of the main pancreatic duct in the pancreatic transverse section. Angzhi Li and his colleagues have studied the impact of the location of the pancreatic duct on POPF. And they found the risk of POPF was reduced when the center of pancreatic duct is far from the edge of pancreas.

Bardol and his colleagues conducted a retrospective cohort study and consolidated that a long remnant pancreatic neck could be an independent risk factor for POPF after pancreaticoduodenectomy. However, to date, there exists no randomized study dedicated to answering whether patients could benefit from extended pancreatic neck transection during LPD. Thus, we conduct a multicenter randomized trial, LPDEXCEPT, with the hypothesis that extended pancreatic neck transection has superiority to conventional pancreatic neck transection.

The broad goal of this trial is to evaluate the superiority of extended pancreatic neck transection during LPD.

## II. What will be done if you participate in the research?

If you meet the inclusion criteria and agree to participate, you will be tested according to the following steps: divided into two groups according to the study plan, respectively, undergoing extended pancreatic neck transection or conventional pancreatic neck transection during LPD. You may be assigned in any group. All patients underwent routine nursing of biliary and pancreatic surgery, and collected various indexes before, during and after surgery. At the same time, follow-up for 3 months. The time points of follow-up were the first and third month postoperatively. The follow-up method was ward follow-up combined with telephone follow-up.

## III. What are the alternative treatment options?

Patients with resectable benign or malignant tumors of the lower common bile duct, periampullary region of the duodenum, and head of the pancreas could participate in this trial. Alternative treatment options for patients with benign tumors include regular follow-up with conservative observation. According to the existing guidelines, surgical resection is preferred for patients with resectable malignant tumors, and no other treatment alternatives are recommended.

## IV. Who can participate in this study? Who is not suitable for research?

Who can:

- (1) Patients with benign or resectable malignant tumors of the lower common bile duct, Vater ampulla, head or uncinata process of the pancreas.
- (2) 18 years old < age < 80 years old, no gender limit.



Informed consent  
Version date: 2023-02-21 version: V2.0

---

- (3) Patient is expected survival beyond 3 months.
- (4) No pregnancy or pregnancy plan within 3 months after surgery.
- (5) Nutrition risk score <3 according to the Nutritional Risk Screening for Inpatients 2002 (NRS2002) standard score.
- (6) No contraindication to surgery for anesthetic evaluation.
- (7) The subjects voluntarily joined the study and signed an informed consent form, with good compliance and cooperation with follow-up.

Who not:

- (1) Patients with borderline resectable and unresectable malignancies.
- (2) Patients undergoing neoadjuvant chemotherapy or radiotherapy.
- (3) Patients with tumors exceeding the level of the gastroduodenal artery as measured by preoperative radiography.
- (4) Intraoperative exploration reveals tumor adhesions with portal vein-superior mesenteric vein, requiring revascularization and reconstruction.
- (5) Operation transfers to open.
- (6) Operation transfers to other procedure.

## V. Adverse reactions, risks, and protective measures for participating in the study.

The main adverse reactions and risks are as follows:

1. In the operation, the surgical method is determined according to medical conditions according to the condition.
2. Due to the patient's condition (critical, complicated, poor systemic conditions), individual differences, sudden and sudden recession may occur during and after surgery, multiple organ failure (such as heart failure, respiratory failure, liver failure, renal function) Failure, DIC, etc.) or unpredictable changes in the condition can be life-threatening.
3. Major bleeding, hemorrhagic shock may occur during surgery, and life-threatening.
4. The operation is due to anatomical variation and severe adhesion for therapeutic purposes. It may be inevitable to damage surrounding and nearby tissues and organs, and the corresponding organs need to be repaired or reconstructed.
5. Special medical supplies such as chemotherapy pumps, anastomotic devices, etc. may be used during surgery, and special treatments such as radiofrequency therapy and cryotherapy may be used during surgery.
6. Tumor patients may not be able to undergo surgical resection due to the condition, or recurrence and metastasis after resection, requiring further treatment.
7. Recurrent bleeding after surgery, local, systemic infection, bile leakage, pancreatic leakage, intestinal leakage, anastomotic leakage, and other changes in the condition may be life-threatening and require reoperation if necessary.
8. Other unforeseen or unpredictable adverse consequences and medical risks.
9. May need to be admitted to the ICU ward, if necessary, after surgery.
10. Postoperative examination may be inconsistent with preoperative diagnosis and intraoperative diagnosis. The final diagnosis is based on postoperative examination.

Informed consent  
Version date: 2023-02-21 version: V2.0

---

11. Determine the risk of biopsy of the lesion under the endoscope under the condition of the operation.

12. During the operation, malignant tumor metastasis is found, and it is difficult to cure radically or radically. The risk of radical resection is great. Only palliative anastomosis is possible.

13. During the operation, the abdominal cavity is widely metastasized, and it is impossible to perform resection or palliative anastomosis.

14. Postoperative abdominal adhesions, intestinal adhesions, intestinal obstruction, may require relevant treatment.

15. Long-term bed rest, pulmonary infection, and deep vein thrombosis may occur.

16. Incision healing may occur after surgery, infection of the incision, incision splitting, incisional hernia, etc.

17. Pancreatic exocrine insufficiency.

18. Laparoscopic pancreaticoduodenectomy may be due to tissue adhesion, intraoperative bleeding, etc.

19. Pneum abdominal syndrome, etc.

## VI. What will be done in the event of any of these adverse events during the study?

If there is any discomfort in the study, or the condition changes, or any unexpected situation, regardless of whether it is related to treatment, you should promptly notify your doctor, he/she will make an accurate judgment and medical treatment. deal with. If the patients participating in the trial have the above complications, they will form a professional medical team to deal with and treat them for the first time. If an adverse event occurs in a clinical trial, the Medical Expert Committee will determine if it is related to surgery or trial. The treatment and examinations required for other diseases that you have combined at the same time will not be included in the free range.

## VII. Possible benefits of participating in the Study.

By participating in this study, your condition may improve. And the study may help determine which treatments are safer and more effective in treating other patients with conditions like yours.

## VIII. The relevant costs.

Subjects will not pay for participation in this trial, except for the costs incurred during the treatment.

## IX. The confidentiality of clinical data.

Your medical records (research medical records, CRF, test results, etc.) will be kept completely at

Informed consent  
Version date: 2023-02-21 version: V2.0

---

the hospital where you are attending. The doctor will record the results of the tests and other tests on your medical record. Researchers, ethics committees, and higher-level medical administrations will be allowed to access your medical records. Any public report about the results of this study will not disclose your personal identity. We will make every effort to protect the privacy of your personal medical information to the extent permitted by law. According to medical research ethics, in addition to personal privacy information, experimental data will be available for public inquiry and sharing. Query and sharing will be limited to web-based electronic databases, ensuring that no personal privacy information will be disclosed.

## X. Do you have to participate in the trial?

Whether or not to participate in the research is entirely up to you. You may decline to participate in the study or withdraw from the study at any time during the study, which will not affect your relationship with the doctor and will not affect your medical or other benefits.

For your best interest, your doctor or researcher may discontinue your participation in this study at any time during your research.

Informed consent  
Version date: 2023-02-21 version: V2.0

---

Signature page

**Clinical Research Project:** Extended pancreatic neck transection versus conventional pancreatic neck transection during laparoscopic pancreaticoduodenectomy (LPDEXCEPT): a multicenter superiority randomized controlled trial.

**Research Center Name:** \_\_\_\_\_

Subject's Statement: I have carefully read the contents of the informed consent form, and the researchers have answered my questions. I fully participated in the study and fully cooperated with the researcher after fully understanding the purpose, method, possible therapeutic benefits and possible risks and other provisions mentioned in the informed consent form. I understand that I can withdraw from the study at any time, and I do not need any reason. The medical services I receive and the legal rights I enjoy are not affected at all. Finally, I decided to agree to participate in this study and to ensure compliance with my doctor's advice.

**Subject Signature:** \_\_\_\_\_

**Date:** \_\_\_\_\_

**Contact Number:** \_\_\_\_\_

**Subject's Legal Agent signature (If applicable):**

**Date:** \_\_\_\_\_

**Contact Number:** \_\_\_\_\_

Doctor's Statement: I have explained fully detail to the subjects, including the potential risks.

**Doctor Signature:** \_\_\_\_\_

**Date:** \_\_\_\_\_

**Contact Number:** \_\_\_\_\_

**Ethics Committee on Biomedical Research of West China Hospital of Sichuan University**

**Contact Number:028-85422654, 028-85423237**

# 探究腹腔镜胰十二指肠切除术中胰颈离断位置与术后胰瘘发生的相关性关系

## 临床研究知情同意书

### 尊敬的受试者

我们邀请您参加四川大学华西医院批准开展的“探究腹腔镜胰十二指肠切除术中胰颈离断位置与术后胰瘘发生的相关性关系”课题研究。本研究将在贵州医科大学附属医院、攀枝花中心医院、山东省立医院、复旦大学附属肿瘤医院、广东省中医院、乐山市人民医院、云南省第一人民医院、常州市第一人民医院、齐鲁医院、南方医院等医院共同开展，估计将有 184 名受试者自愿参加。本研究已经得到四川大学华西医院生物医学伦理审查委员会的审查和批准。

#### 1. 为什么要开展本项研究?

胰十二指肠切除术是治疗胰腺头部、胆总管下段及十二指肠壶腹周围肿瘤的标准术式。随着微创外科理念的不断发展，腹腔镜胰十二指肠切除术由于具有创伤小、出血量少、恢复快、疼痛轻等优势而得以发展。

胰瘘是 LPD 术后常见的并发症。探究 POPF 发生相关性因素，从而精准预防和管理 POPF、降低 POPF 发生率是胰腺外科领域主要研究内容。

目前导管对黏膜是学界广泛接受的胰肠吻合方式，手术操作时须将胰颈切缘面的主胰管和小肠黏膜进行缝合，既往相关研究表明主胰管在胰颈切缘面的位置是影响手术时吻合操作的因素之一，主胰管是否在切缘中央与术后是否发生 POPF 相关。主胰管在胰腺不同部位的走行位置不同：在胰腺体尾部，主胰管走行于胰腺的中间；从胰腺体部向胰腺头部的过程中，主胰管走行方向逐渐偏向足侧和后侧。因此，LPD 手术过程中，离断胰腺颈部的的位置决定了主胰管在胰腺切缘断面的位置。

胰腺各部分动脉血供不同：胰腺头部的血供主要由胃十二指肠动脉发出的胰十二指肠上动脉和肠系膜上动脉发出的胰十二指肠下动脉形成的胰十二指肠前后动脉弓完成；胰腺体尾部的血供主要由脾动脉发出的数支分支完成。胰腺颈部血供由胰背动脉完成，而该动脉常存在变异和缺失，因此胰腺颈部常存在一段乏血供区。因此，在 LPD 术中，离断胰腺颈部的的位置也影响胰腺切缘面血供是否充足。

综合上述两方面原因，LPD 术中离断胰腺颈部的的位置在学界存在争议。既往一份回

1  
2  
3  
4 回顾性研究表明，在距离肠系膜上静脉-门静脉左侧缘 7mm 处离断胰腺颈部是 POPF 的保护  
5  
6 性因素。但该结论有待进一步前瞻性随机对照试验研究证实。

7  
8 因此，本研究项目拟通过开展回顾性及前瞻性两部分研究工作探究腹腔镜胰十二指肠  
9  
10 肠切除术中胰颈离断位置与术后胰瘘发生的相关性关系。

## 11 12 13 2. 如果参加研究，您需要做什么？

14  
15 您首次住院期间除常规诊疗过程外无特殊额外工作。首次手术后 3 月内需按医生要  
16  
17 求进行随访。受试期间，您可能随机被分配到对照组和实验组。对照组在 LPD 术中将在  
18  
19 门静脉-肠系膜上静脉正前方离断胰腺颈部；实验组 LPD 术中将在门静脉-肠系膜上静脉  
20  
21 左侧缘 0.5-1.0cm 处离断胰腺颈部。

## 22 23 24 3. 可供选择的诊疗方案有哪些？

25  
26 患者为可切除的胆总管下段、十二指肠壶腹周围、胰腺头部良恶性肿瘤。其中良性  
27  
28 肿瘤患者可选择的其他诊疗方法包括：定期随访保守观察治疗。依据现有指南，可切除  
29  
30 的恶性肿瘤患者首选手术切除，无其他诊疗方法推荐。

## 31 32 33 4. 哪些人不宜参加研究？

34  
35 如果您为 1) 临界可切除及不可切除恶性肿瘤患者 2) 行新辅助放化疗患者 3) 术  
36  
37 前影像学判断肿瘤超过胃十二指肠动脉水平患者 4) 术中探查发现肿瘤与门静脉-肠系膜  
38  
39 上静脉粘连，需行血管切除重建患者 5) 术中中转开腹患者 6) 术中探查后转行其他手  
40  
41 术方式患者，则不宜参加本研究。7) 根据《住院患者营养风险筛查 2002 (NRS2002)》  
42  
43 标准评分，营养风险评分 < 3 分。

## 44 45 46 5. 参加研究有哪些风险？

47  
48 参加研究，患者将面临行腹腔镜胰十二指肠切除术常规面临的麻醉风险及手术风  
49  
50 险，具体包括：

### 51 52 A. 麻醉风险

53  
54 1) 麻醉过程中可能进行以下某一项或多项操作，包括气管插管、椎管内穿刺、周  
55  
56 围神经阻滞、深静脉穿刺置管术、动脉穿刺置管术、喉罩插入、气管切开术、气管和支  
57  
58 气管镜检查、食管超声波检查、有创血液动力学监测等。这些操作均可能引起组织出血、  
59  
60 神经损伤、创伤、感染、坏死等。



2) 根据麻醉操作常规，按照《中华人民共和国药典》要求使用各种、各类麻醉药后，病人可能出现中毒、过敏、高敏、神经毒性等反应，导致休克、严重脏器功能损害、呼吸心跳停止，甚至生命危险。已麻醉时，特别是急症和饱腹病人发生胃内容物反流、误吸、喉痉挛、呼吸道梗阻、神经反射性休克和心律失常等而致重要脏器功能损害，危及生命。

3) 气管插管可引起牙齿脱落、口唇、舌、咽喉、声带、气管和支气管损伤，喉痉挛、气管痉挛、支气管痉挛及功能损害。气管插管困难通气不能维持时，可能需要进行紧急气管切开术，缺氧时可危及生命。

4) 椎管内麻醉及区域麻醉发生神经、血管、脊髓等组织结构损伤，可能出现全脊髓麻醉、截瘫、椎管内感染、血肿、腰痛、头痛、肢体伤残、甚至呼吸心跳停止等危及生命。

5) 患者本身合并其他疾病或有重要脏器损害者，相关并发症和麻醉危险性显著增加。

6) 麻醉方法的选择和改变由实施麻醉的医师根据病情和手术的需要决定。 7) 可能发生术中知晓和术后回忆。

8) 其它发生率极低或难以预料的意外和并发症，以及其它不可预料的不良后果。

9) 麻醉手术中输血输液可能发生致热源反应、过敏反应、血源性传染病等。

#### B. 手术风险

1) 术中损伤神经、血管及邻近器官，如：脾、胃肠道、肾脏、肾上腺等。

2) 术中大出血，导致失血性休克，严重者死亡（脾动/静脉、门静脉损伤）。

3) 伤口积液、血肿、感染、裂开、延迟愈合或不愈合，瘘管及窦道形成，切口疝。

4) 术后乳糜瘘，需长时间保持引流管通畅或经皮穿刺引流，需长时间药物治疗（生长抑素或生长抑素类似物），症状严重者需介入、手术等侵入性治疗，严重者可能导致死亡。

5) 术后胆漏，胆肠吻合口瘘，需行腹腔通畅引流，部分胆瘘可自愈，若常规治疗以及引流无效、病情恶化时，需行手术治疗。

6) 术后手术部位或腹腔出血，可能需要行介入治疗，必要时再次手术。

7) 术后腹腔积液，腹膜炎，腹腔感染，甚至腹腔脓肿，需再次手术可能。

8) 术后胰瘘，若出现临床相关胰瘘，不排除二次穿刺甚至再次手术治疗，甚至危及患者生命。

- 1  
2  
3  
4 9) 术后肠粘连，粘连性肠梗阻。
- 5  
6 10) 营养性并发症：营养不良、体重减轻、贫血、腹泻和脂肪泻、代谢性骨病。
- 7  
8 11) 脑并发症：脑血管意外、癫痫。
- 9  
10 12) 呼吸并发症：肺不张、肺感染、胸腔积液、气胸等。
- 11  
12 13) 心脏并发症：心律失常、心肌梗死、心衰、心跳骤停。
- 13  
14 14) 血栓性静脉炎，以致肺栓塞、脑栓塞或其他部位栓塞。
- 15  
16 15) 多脏器功能衰竭（包括弥漫性血管内凝血）。
- 17  
18 16) 水电解质平衡紊乱。
- 19  
20 17) 诱发原有疾病恶化。
- 21  
22 18) 术中胃肠道损伤，导致术后胃肠漏，胃肠吻合口瘘可能。
- 23  
24 19) 术后胃排空障碍，出现术后腹胀、恶心、呕吐。
- 25  
26 20) 术后门静脉系统、肠系膜血管血栓形成。
- 27  
28 21) 胰性脑病。
- 29  
30 22) 术后成人呼吸窘迫综合症（ARDS）。
- 31  
32 23) 术后胰腺外分泌功能不全，导致血糖升高、甚至糖尿病可能。
- 33  
34 24) 术后胰腺内分泌功能不全，导致消化吸收功能障碍，导致顽固性腹泻等。
- 35  
36 25) 术后胰源性门静脉高压症，导致消化道大出血等。
- 37  
38 26) 术后胰源性胸水和腹水。
- 39  
40 27) 若为恶性肿瘤，肿瘤切除术后复发，远处转移。
- 41  
42 28) 术后胃肠道出血，应激性溃疡，严重者死亡。
- 43  
44 29) 如果卧床时间较长可能导致肺部感染，泌尿系统感染，褥疮，深静脉血栓及肺  
45 栓塞、脑栓塞等。
- 46  
47 30) 术后远期并发症：胆肠吻合术后可发生胆肠吻合口狭窄、胆管结石、胆管炎、  
48 肝脓肿；胃部分切除及胃肠吻合术后可能导致营养不良、吻合口溃疡、消化道出血、倾  
49 倒综合征；胰腺切除及胰肠吻合术后可能导致胰腺内分泌及外分泌功能不全、胰肠吻合  
50 口狭窄、慢性胰腺炎、胰管结石。
- 51  
52  
53  
54 31) 术后诊断可能与术中冰冻检查结果不一致，最终诊断根据术后病理结果决定。
- 55  
56 32) 其它目前无法预料的风险和并发症。
- 57  
58  
59  
60



#### 6. 研究过程中受试者出现上述不良事件时，将如何处理？

若发生不良事件应及时由医生或患者报告给研究者，研究者在病例报告表的相应位置做详细记录，研究者应在尊重患者意愿及选择的前提下协助患者积极处理不良事件，争取获得最佳的预后。同时对可能发生的不良事件进行预防。若发生严重不良事件时，研究者及医护人员将按照严重不良事件救治预案进行处理：报告：研究者向科室负责人及医院值班人员报告不良事件性质，并在 24 小时内报告伦理委员会及相关主管部门。及时救治受试者：一旦发生严重不良事件，根据受试者具体不良事件情况迅速采取相应诊疗措施，对受试者进行抢救，必要时送 ICU 诊治。记录：研究者在原始病案和 CRF 表中记录受试者的症状、体征、实验室检查，严重不良事件出现时间、持续时间、程度、处理措施和经过，保证记录完整、真实、准确、及时。填写严重不良事件报告表。随访：研究者对受试者不良事件进行随访，根据病情决定随访时间，在随访过程中给予必要的处理及治疗措施，确保将受试者损害降至最低，充分保证受试者安全。并且详细记录随访经过和处理结果。当发生严重不良事件时，研究将对受试者进行及时救治，并依据相关法律法规给予适当补偿。

#### 7. 参加研究有哪些可能的益处？

参加本项研究，您的病情有可能获得改善，本项研究还有助于确定哪种治疗方法可以更安全有效地治疗与您具有相似病情的其他病人。

#### 8. 参加研究需要支付有关费用吗？

研究员将应当公平、合理地选择受试者。除需要支付诊疗过程中产生的费用外，受试者参加本研究不支付其他任何费用。

#### 9. 个人信息是保密的吗？

您的研究资料将保存在四川大学华西医院，研究者、研究主管部门、伦理审查委员会可查阅您的医疗记录。任何有关本项研究结果的公开报告将不会披露您的个人身份。我们将在法律允许的范围内，尽一切努力保护您个人医疗资料的隐私和个人信息。

#### 10. 我必须参加研究吗？

参加本项研究是完全自愿的，您可以拒绝参加研究，或在试验的任何阶段随时退出本研究而不会受到歧视和报复，其医疗待遇与权益不受影响。如果您决定退出本研究，请与您的医生联系，以便妥善诊疗疾病。

1  
2  
3  
4  
5  
6  
7  
8  
9  
10  
11  
12  
13  
14  
15  
16  
17  
18  
19  
20  
21  
22  
23  
24  
25  
26  
27  
28  
29  
30  
31  
32  
33  
34  
35  
36  
37  
38  
39  
40  
41  
42  
43  
44  
45  
46  
47  
48  
49  
50  
51  
52  
53  
54  
55  
56  
57  
58  
59  
60

---

**受试者声明：**我已经阅读了上述有关本研究的介绍，我的研究人员已向我充分解释和说明了本研究的目的是、操作过程以及参加本研究可能存在的风险和潜在的获益，并回答了我所有相关问题。自愿参加本研究。

我同意  或拒绝  除本研究以外的其他研究利用我的研究资料和生物标本。

受试者正楷姓名： \_\_\_\_\_

受试者签名： \_\_\_\_\_ 日期： \_\_\_\_ 年 \_\_\_\_ 月 \_\_\_\_ 日

受试者的联系电话： \_\_\_\_\_ 手机号： \_\_\_\_\_

法定代理人正楷姓名： \_\_\_\_\_ （如适用）

与受试者关系： \_\_\_\_\_

法定代理人签名： \_\_\_\_\_ 日期： \_\_\_\_ 年 \_\_\_\_ 月 \_\_\_\_ 日

需法定代理人签署的原因： \_\_\_\_\_

见证人正楷姓名： \_\_\_\_\_ （如适用）

见证人签名： \_\_\_\_\_ 日期： \_\_\_\_ 年 \_\_\_\_ 月 \_\_\_\_ 日

需见证人签署的原因： \_\_\_\_\_

**医生声明：**我已对上述参加本研究的自愿者说明了该项研究的有关细节，并且为他/她提供一份签署过的知情同意书的原件。我确认已向受试者详细解释了本研究的情况，特别是参加本研究可能产生的风险与受益、免费与补偿、损害与赔偿、自愿与保密等伦理原则和要求。

医生签名： \_\_\_\_\_ 日期： \_\_\_\_ 年 \_\_\_\_ 月 \_\_\_\_ 日

医生的联系电话： \_\_\_\_\_

四川大学华西医院生物医学伦理审查委员会 联系电话： 028-85422654, 028-85423237

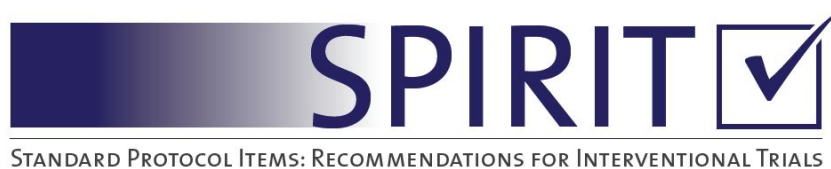

STANDARD PROTOCOL ITEMS: RECOMMENDATIONS FOR INTERVENTIONAL TRIALS

SPIRIT 2013 Checklist: Recommended items to address in a clinical trial protocol and related documents\*

| Section/item                      | Item No | Description                                                                                                                                                                                                                                                                              | Page No. |
|-----------------------------------|---------|------------------------------------------------------------------------------------------------------------------------------------------------------------------------------------------------------------------------------------------------------------------------------------------|----------|
| <b>Administrative information</b> |         |                                                                                                                                                                                                                                                                                          |          |
| Title                             | 1       | Descriptive title identifying the study design, population, interventions, and, if applicable, trial acronym                                                                                                                                                                             | 1        |
| Trial registration                | 2a      | Trial identifier and registry name. If not yet registered, name of intended registry                                                                                                                                                                                                     | 2        |
|                                   | 2b      | All items from the World Health Organization Trial Registration Data Set                                                                                                                                                                                                                 | -        |
| Protocol version                  | 3       | Date and version identifier                                                                                                                                                                                                                                                              | -        |
| Funding                           | 4       | Sources and types of financial, material, and other support                                                                                                                                                                                                                              | 19       |
| Roles and responsibilities        | 5a      | Names, affiliations, and roles of protocol contributors                                                                                                                                                                                                                                  | 19       |
|                                   | 5b      | Name and contact information for the trial sponsor                                                                                                                                                                                                                                       | 19       |
|                                   | 5c      | Role of study sponsor and funders, if any, in study design; collection, management, analysis, and interpretation of data; writing of the report; and the decision to submit the report for publication, including whether they will have ultimate authority over any of these activities | 19       |
|                                   | 5d      | Composition, roles, and responsibilities of the coordinating centre, steering committee, endpoint adjudication committee, data management team, and other individuals or groups overseeing the trial, if applicable (see Item 21a for data monitoring committee)                         | -        |
| <b>Introduction</b>               |         |                                                                                                                                                                                                                                                                                          |          |
| Background and rationale          | 6a      | Description of research question and justification for undertaking the trial, including summary of relevant studies (published and unpublished) examining benefits and harms for each intervention                                                                                       | 3,4      |
|                                   | 6b      | Explanation for choice of comparators                                                                                                                                                                                                                                                    | -        |
| Objectives                        | 7       | Specific objectives or hypotheses                                                                                                                                                                                                                                                        | 4        |
| Trial design                      | 8       | Description of trial design including type of trial (eg, parallel group, crossover, factorial, single group), allocation ratio, and framework (eg, superiority, equivalence, noninferiority, exploratory)                                                                                | 4,5      |

## Methods: Participants, interventions, and outcomes

|                      |     |                                                                                                                                                                                                                                                                                                                                                                                |      |
|----------------------|-----|--------------------------------------------------------------------------------------------------------------------------------------------------------------------------------------------------------------------------------------------------------------------------------------------------------------------------------------------------------------------------------|------|
| Study setting        | 9   | Description of study settings (eg, community clinic, academic hospital) and list of countries where data will be collected. Reference to where list of study sites can be obtained                                                                                                                                                                                             | 7,8  |
| Eligibility criteria | 10  | Inclusion and exclusion criteria for participants. If applicable, eligibility criteria for study centres and individuals who will perform the interventions (eg, surgeons, psychotherapists)                                                                                                                                                                                   | 5,6  |
| Interventions        | 11a | Interventions for each group with sufficient detail to allow replication, including how and when they will be administered                                                                                                                                                                                                                                                     | 6,8  |
|                      | 11b | Criteria for discontinuing or modifying allocated interventions for a given trial participant (eg, drug dose change in response to harms, participant request, or improving/worsening disease)                                                                                                                                                                                 | 6,8  |
|                      | 11c | Strategies to improve adherence to intervention protocols, and any procedures for monitoring adherence (eg, drug tablet return, laboratory tests)                                                                                                                                                                                                                              | 6,8  |
|                      | 11d | Relevant concomitant care and interventions that are permitted or prohibited during the trial                                                                                                                                                                                                                                                                                  | -    |
| Outcomes             | 12  | Primary, secondary, and other outcomes, including the specific measurement variable (eg, systolic blood pressure), analysis metric (eg, change from baseline, final value, time to event), method of aggregation (eg, median, proportion), and time point for each outcome. Explanation of the clinical relevance of chosen efficacy and harm outcomes is strongly recommended | 6,7  |
| Participant timeline | 13  | Time schedule of enrolment, interventions (including any run-ins and washouts), assessments, and visits for participants. A schematic diagram is highly recommended (see Figure)                                                                                                                                                                                               | 9,10 |
| Sample size          | 14  | Estimated number of participants needed to achieve study objectives and how it was determined, including clinical and statistical assumptions supporting any sample size calculations                                                                                                                                                                                          | 8    |
| Recruitment          | 15  | Strategies for achieving adequate participant enrolment to reach target sample size                                                                                                                                                                                                                                                                                            | 11   |

## Methods: Assignment of interventions (for controlled trials)

### Allocation:

|                     |     |                                                                                                                                                                                                                                                                                                                                                          |       |
|---------------------|-----|----------------------------------------------------------------------------------------------------------------------------------------------------------------------------------------------------------------------------------------------------------------------------------------------------------------------------------------------------------|-------|
| Sequence generation | 16a | Method of generating the allocation sequence (eg, computer-generated random numbers), and list of any factors for stratification. To reduce predictability of a random sequence, details of any planned restriction (eg, blocking) should be provided in a separate document that is unavailable to those who enrol participants or assign interventions | 11,12 |
|---------------------|-----|----------------------------------------------------------------------------------------------------------------------------------------------------------------------------------------------------------------------------------------------------------------------------------------------------------------------------------------------------------|-------|

|    |                                                           |     |                                                                          |       |
|----|-----------------------------------------------------------|-----|--------------------------------------------------------------------------|-------|
| 1  |                                                           |     |                                                                          |       |
| 2  | Allocation                                                | 16b | Mechanism of implementing the allocation sequence (eg, central           | 12    |
| 3  | concealment                                               |     | telephone; sequentially numbered, opaque, sealed envelopes),             |       |
| 4  | mechanism                                                 |     | describing any steps to conceal the sequence until interventions are     |       |
| 5  |                                                           |     | assigned                                                                 |       |
| 6  |                                                           |     |                                                                          |       |
| 7  | Implementation                                            | 16c | Who will generate the allocation sequence, who will enrol participants,  | 12    |
| 8  |                                                           |     | and who will assign participants to interventions                        |       |
| 9  |                                                           |     |                                                                          |       |
| 10 | Blinding                                                  | 17a | Who will be blinded after assignment to interventions (eg, trial         | 12    |
| 11 | (masking)                                                 |     | participants, care providers, outcome assessors, data analysts), and     |       |
| 12 |                                                           |     | how                                                                      |       |
| 13 |                                                           |     |                                                                          |       |
| 14 |                                                           |     |                                                                          |       |
| 15 |                                                           | 17b | If blinded, circumstances under which unblinding is permissible, and     | -     |
| 16 |                                                           |     | procedure for revealing a participant's allocated intervention during    |       |
| 17 |                                                           |     | the trial                                                                |       |
| 18 |                                                           |     |                                                                          |       |
| 19 |                                                           |     |                                                                          |       |
| 20 | <b>Methods: Data collection, management, and analysis</b> |     |                                                                          |       |
| 21 | Data collection                                           | 18a | Plans for assessment and collection of outcome, baseline, and other      | 12    |
| 22 | methods                                                   |     | trial data, including any related processes to promote data quality (eg, |       |
| 23 |                                                           |     | duplicate measurements, training of assessors) and a description of      |       |
| 24 |                                                           |     | study instruments (eg, questionnaires, laboratory tests) along with      |       |
| 25 |                                                           |     | their reliability and validity, if known. Reference to where data        |       |
| 26 |                                                           |     | collection forms can be found, if not in the protocol                    |       |
| 27 |                                                           |     |                                                                          |       |
| 28 |                                                           |     |                                                                          |       |
| 29 |                                                           |     |                                                                          |       |
| 30 |                                                           | 18b | Plans to promote participant retention and complete follow-up,           | 10    |
| 31 |                                                           |     | including list of any outcome data to be collected for participants who  |       |
| 32 |                                                           |     | discontinue or deviate from intervention protocols                       |       |
| 33 |                                                           |     |                                                                          |       |
| 34 | Data                                                      | 19  | Plans for data entry, coding, security, and storage, including any       | 12,13 |
| 35 | management                                                |     | related processes to promote data quality (eg, double data entry;        |       |
| 36 |                                                           |     | range checks for data values). Reference to where details of data        |       |
| 37 |                                                           |     | management procedures can be found, if not in the protocol               |       |
| 38 |                                                           |     |                                                                          |       |
| 39 |                                                           |     |                                                                          |       |
| 40 | Statistical                                               | 20a | Statistical methods for analysing primary and secondary outcomes.        | 14    |
| 41 | methods                                                   |     | Reference to where other details of the statistical analysis plan can be |       |
| 42 |                                                           |     | found, if not in the protocol                                            |       |
| 43 |                                                           |     |                                                                          |       |
| 44 |                                                           | 20b | Methods for any additional analyses (eg, subgroup and adjusted           | 14    |
| 45 |                                                           |     | analyses)                                                                |       |
| 46 |                                                           |     |                                                                          |       |
| 47 |                                                           | 20c | Definition of analysis population relating to protocol non-adherence     | 14    |
| 48 |                                                           |     | (eg, as randomised analysis), and any statistical methods to handle      |       |
| 49 |                                                           |     | missing data (eg, multiple imputation)                                   |       |
| 50 |                                                           |     |                                                                          |       |
| 51 |                                                           |     |                                                                          |       |
| 52 | <b>Methods: Monitoring</b>                                |     |                                                                          |       |
| 53 |                                                           |     |                                                                          |       |
| 54 | Data monitoring                                           | 21a | Composition of data monitoring committee (DMC); summary of its role      | 12,13 |
| 55 |                                                           |     | and reporting structure; statement of whether it is independent from     |       |
| 56 |                                                           |     | the sponsor and competing interests; and reference to where further      |       |
| 57 |                                                           |     | details about its charter can be found, if not in the protocol.          |       |
| 58 |                                                           |     | Alternatively, an explanation of why a DMC is not needed                 |       |
| 59 |                                                           |     |                                                                          |       |
| 60 |                                                           |     |                                                                          |       |

|    |                                 |     |                                                                                                                                                                                                                                                                                     |       |
|----|---------------------------------|-----|-------------------------------------------------------------------------------------------------------------------------------------------------------------------------------------------------------------------------------------------------------------------------------------|-------|
| 1  |                                 |     |                                                                                                                                                                                                                                                                                     |       |
| 2  |                                 | 21b | Description of any interim analyses and stopping guidelines, including who will have access to these interim results and make the final decision to terminate the trial                                                                                                             | 12,13 |
| 3  |                                 |     |                                                                                                                                                                                                                                                                                     |       |
| 4  |                                 |     |                                                                                                                                                                                                                                                                                     |       |
| 5  |                                 |     |                                                                                                                                                                                                                                                                                     |       |
| 6  | Harms                           | 22  | Plans for collecting, assessing, reporting, and managing solicited and spontaneously reported adverse events and other unintended effects of trial interventions or trial conduct                                                                                                   | 13    |
| 7  |                                 |     |                                                                                                                                                                                                                                                                                     |       |
| 8  |                                 |     |                                                                                                                                                                                                                                                                                     |       |
| 9  |                                 |     |                                                                                                                                                                                                                                                                                     |       |
| 10 |                                 |     |                                                                                                                                                                                                                                                                                     |       |
| 11 | Auditing                        | 23  | Frequency and procedures for auditing trial conduct, if any, and whether the process will be independent from investigators and the sponsor                                                                                                                                         | 13    |
| 12 |                                 |     |                                                                                                                                                                                                                                                                                     |       |
| 13 |                                 |     |                                                                                                                                                                                                                                                                                     |       |
| 14 |                                 |     |                                                                                                                                                                                                                                                                                     |       |
| 15 |                                 |     |                                                                                                                                                                                                                                                                                     |       |
| 16 | <b>Ethics and dissemination</b> |     |                                                                                                                                                                                                                                                                                     |       |
| 17 | Research ethics approval        | 24  | Plans for seeking research ethics committee/institutional review board (REC/IRB) approval                                                                                                                                                                                           | 15    |
| 18 |                                 |     |                                                                                                                                                                                                                                                                                     |       |
| 19 |                                 |     |                                                                                                                                                                                                                                                                                     |       |
| 20 | Protocol amendments             | 25  | Plans for communicating important protocol modifications (eg, changes to eligibility criteria, outcomes, analyses) to relevant parties (eg, investigators, REC/IRBs, trial participants, trial registries, journals, regulators)                                                    | 13    |
| 21 |                                 |     |                                                                                                                                                                                                                                                                                     |       |
| 22 |                                 |     |                                                                                                                                                                                                                                                                                     |       |
| 23 |                                 |     |                                                                                                                                                                                                                                                                                     |       |
| 24 |                                 |     |                                                                                                                                                                                                                                                                                     |       |
| 25 |                                 |     |                                                                                                                                                                                                                                                                                     |       |
| 26 | Consent or assent               | 26a | Who will obtain informed consent or assent from potential trial participants or authorised surrogates, and how (see Item 32)                                                                                                                                                        | 15    |
| 27 |                                 |     |                                                                                                                                                                                                                                                                                     |       |
| 28 |                                 |     |                                                                                                                                                                                                                                                                                     |       |
| 29 |                                 |     |                                                                                                                                                                                                                                                                                     |       |
| 30 |                                 | 26b | Additional consent provisions for collection and use of participant data and biological specimens in ancillary studies, if applicable                                                                                                                                               | -     |
| 31 |                                 |     |                                                                                                                                                                                                                                                                                     |       |
| 32 |                                 |     |                                                                                                                                                                                                                                                                                     |       |
| 33 | Confidentiality                 | 27  | How personal information about potential and enrolled participants will be collected, shared, and maintained in order to protect confidentiality before, during, and after the trial                                                                                                | 13    |
| 34 |                                 |     |                                                                                                                                                                                                                                                                                     |       |
| 35 |                                 |     |                                                                                                                                                                                                                                                                                     |       |
| 36 |                                 |     |                                                                                                                                                                                                                                                                                     |       |
| 37 | Declaration of interests        | 28  | Financial and other competing interests for principal investigators for the overall trial and each study site                                                                                                                                                                       | 18    |
| 38 |                                 |     |                                                                                                                                                                                                                                                                                     |       |
| 39 |                                 |     |                                                                                                                                                                                                                                                                                     |       |
| 40 | Access to data                  | 29  | Statement of who will have access to the final trial dataset, and disclosure of contractual agreements that limit such access for investigators                                                                                                                                     | 12    |
| 41 |                                 |     |                                                                                                                                                                                                                                                                                     |       |
| 42 |                                 |     |                                                                                                                                                                                                                                                                                     |       |
| 43 |                                 |     |                                                                                                                                                                                                                                                                                     |       |
| 44 |                                 |     |                                                                                                                                                                                                                                                                                     |       |
| 45 | Ancillary and post-trial care   | 30  | Provisions, if any, for ancillary and post-trial care, and for compensation to those who suffer harm from trial participation                                                                                                                                                       | -     |
| 46 |                                 |     |                                                                                                                                                                                                                                                                                     |       |
| 47 |                                 |     |                                                                                                                                                                                                                                                                                     |       |
| 48 | Dissemination policy            | 31a | Plans for investigators and sponsor to communicate trial results to participants, healthcare professionals, the public, and other relevant groups (eg, via publication, reporting in results databases, or other data sharing arrangements), including any publication restrictions | 15    |
| 49 |                                 |     |                                                                                                                                                                                                                                                                                     |       |
| 50 |                                 |     |                                                                                                                                                                                                                                                                                     |       |
| 51 |                                 |     |                                                                                                                                                                                                                                                                                     |       |
| 52 |                                 |     |                                                                                                                                                                                                                                                                                     |       |
| 53 |                                 |     |                                                                                                                                                                                                                                                                                     |       |
| 54 |                                 | 31b | Authorship eligibility guidelines and any intended use of professional writers                                                                                                                                                                                                      | 15    |
| 55 |                                 |     |                                                                                                                                                                                                                                                                                     |       |
| 56 |                                 |     |                                                                                                                                                                                                                                                                                     |       |
| 57 |                                 | 31c | Plans, if any, for granting public access to the full protocol, participant-level dataset, and statistical code                                                                                                                                                                     | 15    |
| 58 |                                 |     |                                                                                                                                                                                                                                                                                     |       |
| 59 |                                 |     |                                                                                                                                                                                                                                                                                     |       |
| 60 |                                 |     |                                                                                                                                                                                                                                                                                     |       |

**Appendices**

|                            |    |                                                                                                                                                                                                |          |
|----------------------------|----|------------------------------------------------------------------------------------------------------------------------------------------------------------------------------------------------|----------|
| Informed consent materials | 32 | Model consent form and other related documentation given to participants and authorised surrogates                                                                                             | Appendix |
| Biological specimens       | 33 | Plans for collection, laboratory evaluation, and storage of biological specimens for genetic or molecular analysis in the current trial and for future use in ancillary studies, if applicable | -        |

---

For peer review only
